# 1 Dual RNA-seq reveals no plastic transcriptional response of the 2 coccidian parasite *Eimeria falciformis* to host immune defenses

3

4 Totta Ehret<sup>1,2</sup>, Simone Spork<sup>1</sup>, Christoph Dieterich<sup>3</sup>, Richard Lucius<sup>1</sup>, Emanuel Heitlinger<sup>1,4</sup>

5

6 1. Institute of Biology, Molecular Parasitology, Humboldt-Universität zu Berlin

7 Philippstr. 13, Haus 14, 10115 Berlin, Germany

8 2. FG16 - Mycotic and parasitic agents and mycobacteria, Robert Koch Institute, Berlin,

9 Germany

10 3. University Hospital Heidelberg - German Center for Cardiovascular Research (DZHK),

11 Analysezentrum III, Im Neuenheimer Feld 669, 69120 Heidelberg, Germany

12 4. Leibniz Institute for Zoo and Wildlife Research, Research Group Ecology and Evolution of

13 Parasite Host Interactions, Alfred-Kowalke-Str. 17, 10315, Berlin, Germany

14

15

16

## 17 **ABSTRACT**

18 **Background:** Parasites can either respond to differences in immune defenses that exist

19 between individual hosts plastically or, alternatively, follow a genetically canalized (“hard

20 wired”) program of infection. Assuming that large-scale functional plasticity would be

21 discernible in the parasite transcriptome we have performed a dual RNA-seq study of the full

22lifecycle of *Eimeria falciformis* using infected mice with different immune status (e.g. naïve  
23versus immune animals) as models for coccidian infections.

24**Results:** We compared parasite and host transcriptomes (dual transcriptome) between naïve  
25and challenge infected mice, as well as between immune competent and immune deficient  
26ones. Mice with different immune competence show transcriptional differences as well as  
27differences in parasite reproduction (oocyst shedding). Broad gene categories represented by  
28differently abundant host genes indicate enrichments for immune reaction and tissue repair  
29functions. More specifically, TGF-beta, EGF, TNF and IL-1 and IL-6 are examples of functional  
30annotations represented differently depending on host immune status. Much in contrast,  
31parasite transcriptomes were neither different between *Coccidia* isolated from immune  
32competent and immune deficient mice, nor between those harvested from naïve and challenge  
33infected mice. Instead, parasite transcriptomes have distinct profiles early and late in infection,  
34characterized largely by biosynthesis or motility associated functional gene groups,  
35respectively. Extracellular sporozoite and oocyst stages showed distinct transcriptional profiles  
36and sporozoite transcriptomes were found enriched for species specific genes and likely  
37pathogenicity factors.

38**Conclusion:** We propose that the niche and host-specific parasite *E. falciformis* uses a  
39genetically canalized program of infection. This program is likely fixed in an evolutionary  
40process rather than employing phenotypic plasticity to interact with its host. In turn this might  
41(negatively) influence the ability of the parasite to use different host species and (positively or  
42negatively) influence its evolutionary potential for adaptation to different hosts or niches.

43

44Keywords

45Phenotypic plasticity, Parasite lifecycle, Transcriptional plasticity, Apicomplexa, Dual RNA-seq,  
46Dual transcriptomics, Coccidia

## 47INTRODUCTION

48The term plasticity describes the ability of genetically identical organisms to display variable  
49phenotypes, e.g., via different developmental or metabolic programs. So called reaction norms  
50govern how a particular genotype is translated into a phenotype depending on environmental  
51stimuli [1]. The presence of predators is known to alter, e.g., developmental programs of  
52genetically identical prey animals to produce different phenotypes (reviewed in [2]). Infections  
53by pathogens are known to alter host phenotypes: in fact all non-constitutive immune reactions  
54can be regarded as a manifestation of plasticity [3]. Hence, to understand the outcomes of  
55parasitic infections and host-parasite interactions the concept of plasticity is useful.

56

57The reciprocal effect of the within-host environment on parasite phenotypes, i.e. plasticity, is  
58less studied, especially in parasites of animals. For many parasite species it remains unclear  
59whether differences in pathology are due to parasites' genotypic or phenotypic (plastic)  
60differences, the latter resulting from host-parasite interactions, e.g., host immune responses.  
61An exception are Nematode infections (reviewed by [4]), in which for example worm length [5]  
62and other aspects of morphology [6], or developmental timing [7] has been shown to vary with  
63host genotype. However, it is unclear to which extent such differences are passively imposed  
64on the parasite or whether they are responses with functional relevance as an adaptation of  
65the parasite expressing observed phenotypes.

66

67Only recently have transcriptomes been used to investigate plasticity in “infection programs”,  
68which parasites induce as a response to host signals. Since gene expression is orchestrated  
69by the genetic makeup of an organism, plasticity in transcription – when it occurs – is likely to  
70be an adaptation which allows the parasite to react on host stimuli and to produce an altered  
71phenotype. We here distinguish between such plastic (responsive) transcription programs and  
72what is sometimes referred to phenotypic plasticity, which then is a “passive” phenotypic  
73change imposed on the parasite without being controlled at the transcriptional level. A  
74perceivable example could be reduced growth due to “mechanical” impact, e.g., limited space.  
75In a Nematode, the presence of phenotypic plasticity has for example been shown to lack a  
76transcriptional basis [8], and can therefore be regarded “passive”. In contrast, unicellular  
77*Entamoeba* spp. infections of variable pathogenicity (i.e. phenotypic plasticity) manifested also  
78in transcriptional differences under various in vitro conditions [9]. Among apicomplexan  
79parasites, different infection programs with distinct transcriptional profiles have been proposed:  
80in *Plasmodium* spp., the parasite’s transcriptome is distinct in different mouse genotypes  
81(BALB/c and C57BL/6) and tissues within one genotype [10], hence demonstrating the  
82capability for plasticity in this parasite. Similarly and even more closely related to *Eimeria* spp.,  
83the coccidian *Toxoplasma gondii* forms dormant tissue cysts (bradyzoites), a process induced  
84by and depending on the host environment [11], and involving large changes in parasite  
85transcriptomes [12]. In addition, *T. gondii* is capable of infecting all studied warm-blooded  
86vertebrates and all nucleated cells in those animals [13] suggesting parasite plasticity in  
87different host environments also in the tachyzoite stage.

88

89 *E. falciformis* is an intracellular parasite in the phylum Apicomplexa, which comprises more  
90 than 4000 described species [14]. Prominent pathogens of humans are found in this phylum,  
91 such as *T. gondii*, the causative agent of toxoplasmosis, *Plasmodium* spp., causing malaria,  
92 and *Cryptosporidium* spp., which cause cryptosporidiosis. Coccidiosis is a disease of livestock  
93 and wildlife caused by coccidian parasites which are dominated by > 1,800 species of *Eimeria*  
94 [14]. The genus is best known for several species which are problematic for the poultry  
95 industry [15]. *E. falciformis* naturally infects wild and laboratory *Mus musculus*, and its genome  
96 is sequenced and annotated making it a useful model for studying *Eimeria* spp. [16]. The  
97 parasite has its niche in the cecum and upper part of colon, mainly in the cells of the crypts  
98 [17,18]. This monoxenous parasite goes through asexual (schizogony) and sexual  
99 reproduction, which results in the host releasing high numbers of oocysts approximately  
100 between day six and 14 after infection. When a mouse ingests *E. falciformis* oocysts, one  
101 sporulated oocyst releases eight infective sporozoites inside the host, which infect epithelial  
102 crypt cells. Within the epithelium, merozoite stages form in several rounds of asexual  
103 reproduction, followed by gamete formation and sexual reproduction, within the same host.  
104 Schizogony takes place approximately until day six and then gametes form and sexual  
105 reproduction takes place, resulting in unsporulated oocyst shedding. Schizogony is not  
106 completely synchronous; the exact number of schizogony cycles is unclear and could vary  
107 naturally [17,19]. There is evidence for a genetic predisposition of *Eimeria* spp. to perform  
108 different numbers of schizogony cycles, as parasites can be selected to become “precocious”,  
109 completing the lifecycle faster with a reduced number of schizogony cycles [20,21]. Such  
110 results have not been obtained for *E. falciformis*, and similarly, it is not known whether such

111 parasite programs are plastic and can also be triggered by exogenous stimuli, such as host  
112 immune responses.

113  
114 *Eimeria* spp. generally induce host protection against reinfection [19,22–24] and T-cells seem  
115 to play a major role [25,26]. In responses to *E. falciformis* infection of laboratory mice, IFN $\gamma$  is  
116 upregulated [18]. In an IFN $\gamma$ -deficient mouse host model which displays larger weight losses  
117 and intestinal pathology but also lower oocyst output, the wild-type phenotype was recovered  
118 by blocking IL-17A and IL-22 signaling [27]. These studies demonstrate that adaptive immunity  
119 clearly plays a role in limiting the reproductive success of *Eimeria* spp. infection, but effects on  
120 the parasite, apart from reproductive output, remain poorly understood. It is an open question  
121 whether the parasite is passively impacted or responds, e.g., via changes in its transcriptome,  
122 to changes in the host immune response.

123  
124 We used a “dual RNA-seq” approach, i.e., we simultaneously assessed the transcriptomes of  
125 host and parasite in biological samples containing both species [28–32]. Applying this to an  
126 infection of *E. falciformis* in the mouse, we produced host and parasite transcriptomes from the  
127 same samples, tissue, and time-points. We describe and analyze host and parasite mRNA  
128 profiles at several time-points post infection and contrast transcriptomes of naïve and  
129 challenge infected wild-type mice to hosts with strong deficiency in adaptive immune  
130 responses. This approach allows us to screen transcriptional changes which may be involved  
131 in host-parasite interactions for plasticity to alterations in the host immune system. We  
132 hypothesize that changes in the parasite transcriptome would be indicative of a plastic  
133 response allowing for functionally altered infection programs.

134

## 135 RESULTS & DISCUSSION

### 136 Immune competent hosts induce protective immunity against *E. falciformis* 137 infection

138 To investigate *E. falciformis* development throughout the lifecycle in a natural mouse host  
139 (NMRI mice) dual transcriptomes were produced at 3, 5, and 7 days post infection (dpi). We  
140 also investigated parasite development and transcriptomes in a mouse strain which is severely  
141 limited in adaptive immune responses (*Rag1*<sup>-/-</sup>; “immunocompromised” hereafter) with *Rag1*<sup>-/-</sup>  
142 and the respective isogenic background strain (C57BL/6 as control) at day 5 post infection. To  
143 further elucidate host immune responses and parasite sensitivity to host immunity, we also  
144 challenge infected all mouse groups (i.e. infected after recovery of a first infection; see  
145 Methods) and sampled at the same time-points as in naïve mice.

146

147 Infections showed drastically decreased oocyst output (Figure 1A and B) in immune competent  
148 hosts undergoing a second, challenge infection compared to naïve animals infected for the first  
149 time (Mann–Whitney test, in NMRI,  $n = 12$ ,  $U = 32$ ,  $p = 0.004$ ; in C57BL/6,  $n = 24$ ,  $U = 111$ ,  $p =$   
150  $0.008$ ). Similarly, a strong reduction of parasite 18S rRNA in the challenge infection down to  
151 3.5% of the amount measured in naïve hosts was detected in reverse transcription quantitative  
152 PCR (RT-qPCR) in NMRI hosts (Figure 1C). The model inferring this had a good fit ( $R^2 = 0.94$ )  
153 and the change of the intercept for challenged compared to naïve hosts was highly significant  
154 ( $t = -6.71$ ;  $p < 0.001$ ). Differences in the slope were not significant ( $t = -1.522$ ;  $p = 0.15$ ),  
155 indicating that the amount of parasite material on 3 days post infection is sufficient to explain a  
156 linear increase until 7 days post infection. Overall this data is in line with the strong reduction of

157oocyst shedding seen in challenge infected immune competent mice, and suggests that the  
158host immune defense disturbs the parasite during gamogony or oocyst formation. Further,  
159these results do not give support to drastic changes in the parasite's "infection program" and  
160rather suggests a non-plastic lifecycle progression.

161  
162In contrast, in immune deficient mice no significant difference in parasite reproductive success  
163(Figure 1A) was observed between naïve and challenge infection (Mann–Whitney test;  $n = 24$ ,  
164 $U = 96$ ,  $p = 0.10$ ). Both in the immunocompromised and immune competent animals, however,  
165all mice had cleared the infection by day 14. We thereby note that *E. falciformis* infection is  
166self-limiting also in mice without mature T- and B-cells, however with a delayed peak of oocyst  
167shedding in immune deficient hosts (Figure 1B).

168  
169**Parasite and host dual transcriptomes can be assessed in parallel**  
170We found the increase in parasite numbers over time after infection to also be reflected by the  
171proportion of *E. falciformis* mRNAs sequenced in the combined pool of transcripts from host  
172and parasite (for NRMI mice in Figure 1D). Using mRNA from infected cecum epithelium we  
173demonstrate that even early in infection (3 dpi, during early asexual reproduction) there is  
174sufficient parasite material to detect parasite mRNAs in the pool including host mRNAs, and to  
175quantify individual host and parasite mRNA abundance (Table 1). The number of total (host +  
176parasite) read mappings for individual replicates ranged from 25,362,739 (sample  
177Rag\_1stInf\_0dpi\_rep1) to 230,773,955 (NMRI\_2ndInf\_5dpi\_rep1).

178



179 We did not detect bias in overall mRNA abundance patterns induced by, e.g., sequencing  
180 technologies (batch effects) using a multivariate technique (multidimensional scaling). Efficient  
181 normalization was confirmed in that samples with large differences in parasite read proportions  
182 show similar transcriptome signatures (Figure S1). This normalization also resulted in  
183 unimodal distributions of read numbers (Figure S2) in agreement with negative binomial  
184 distributions assumed for statistical modeling and testing.

185

186 Remarkably, on day 7 post infection, the day before oocyst shedding peaks, samples from  
187 infected naïve mouse epithelium contained 77% and 92% parasite mRNA, i.e., drastically more  
188 mRNA from the parasite than from the host (Figure 1D and Table 1). Our transcriptomes for  
189 these late infection samples are in agreement with previously published microarray data from  
190 mice infected with *E. falciformis* [18], as log<sub>2</sub> fold-changes at our 7 days post infection versus  
191 controls correlated strongly – for given mRNAs – with log<sub>2</sub> fold changes at 6 days post  
192 infection versus controls in that study (Spearman's  $\sigma = 0.72$ ,  $n = 9017$ ,  $p < 0.001$ ; Figure S3).  
193 Considering both biological differences in the experiments, such as exact time-points for  
194 sampling, and technical differences between the two methods, this correlation confirms the  
195 adequacy of using dual RNA-seq for assessing the host transcriptome in the presence of large  
196 proportions of parasite mRNA. Below, we first describe changes in the mouse transcriptome  
197 and suggest possible mechanisms at play. Variance in host transcriptome changes upon  
198 infection constitutes a potential environmental stimulus for parasites to react on, as addressed  
199 later.

200

## 201 **The mouse transcriptome undergoes large changes upon *E. falciformis***

### 202 **infection**

203

204 We here show that upon infection with *E. falciformis*, which induces weight loss (Figure S4)  
205 and intestinal pathology in mice, the host transcriptome undergoes drastic changes affecting  
206 more than 3000 individual mRNA profiles significantly (edgeR; glm likelihood-ratio tests  
207 corrected for multiple testing, false discovery rate [FDR] < 0.01, see below). Statistical testing  
208 for differential abundance between infected and uninfected mice revealed that differences in  
209 mRNA abundance were more pronounced (both in magnitude and number of genes affected)  
210 at the two later time-points post infection (Table 2 and Figure 2A). 325 mRNAs were differently  
211 abundant (FDR < 0.01) between controls and 3 dpi, 1,804 mRNAs between controls and 5 dpi,  
212 and 2,711 mRNAs between controls and 7 dpi. This leads to a combined set of 3,453  
213 transcripts responding to infection. Differentially abundant mRNAs early in infection (3 and 5  
214 dpi) were not a mere subset of genes differentially abundant later in infection (7 dpi; Figure  
215 2A), which would be the case if the same genes were regulated throughout infection. Instead,  
216 the transcriptional profile of the mouse changes more fundamentally with different genes  
217 varying in abundance late compared to early in infection.

218

219 To further analyze the distinct responses early and late in infection, we performed hierarchical  
220 clustering on transcript abundance patterns at different time-points post infection (Figure 2B).  
221 Three main sample clusters formed (dendrogram indicating similarities between columns at top  
222 of Figure 2B). Immune deficient *Rag1*<sup>-/-</sup> mice, including infected *Rag1*<sup>-/-</sup> samples, show an  
223 expression pattern most similar to uninfected samples. This similarity between infected and

224non-infected *Rag1*<sup>-/-</sup> samples confirms the immune deficiency phenotype; a failure to react to  
225infection in these mice, and suggests a strong influence of adaptive immune responses on  
226overall transcriptional responses. Surprisingly, these patterns indicate that innate immune  
227responses and other B- and T-cell independent processes play detectable though relatively  
228small roles (mouse gene cluster 4; Mm-cluster hereafter, Figure 2B) in shaping the mouse  
229transcriptome upon *E. falciformis* infection.

230

231***Responses to parasite infection differ between immunocompromised and immune***  
232***competent mice***

233The self-limiting nature of *E. falciformis* infection and host resistance to reinfection ([33] and  
234Figure 1A) makes it interesting to analyze transcriptomes of immune competent hosts in depth.  
235On 3 and 5 days post infection, mRNAs of two clusters of genes have overall high abundance  
236in samples of all immune competent infected animals (Mm-clusters 1 and 2). Other mRNAs  
237(Mm-clusters 3 and 4) show lowered abundance in all those infected samples.

238

239Gene Ontology (GO) terms enriched among the mRNAs which become more abundant only  
240early in infection (Mm-clusters 1 and 2) are, e.g., “stem cell population maintenance”, “mRNA  
241processing”, and “cell cycle G2/M transition”, indicating tissue remodeling in the epithelium. In  
242addition, terms such as “regulation of response to food” are enriched (Table S1). This is  
243interesting since weight losses and malnutrition are generally common during parasitic  
244infections [34, 35], also in *Eimeria* spp. infections [36-38], and weight loss was also seen in the  
245present study (Figure S4).

246

247 Genes whose mRNA levels decreased in abundance upon infection (Mm-clusters 3 and 4)  
248 indicate induction of IL-1 and IL-6, which are involved in inflammation, including T- and B-cell  
249 recruitment and maturation, and broad acute phase immune responses (Table S1). IL-6 has  
250 also been shown to support tissue repair and inhibit apoptosis after epithelial wounding [39]. In  
251 addition, IL-6 is linked to Th17 responses [40] which are known to play an important role in  
252 responses to *E. falciformis* [27]. Further terms indicate a regulation of transforming growth  
253 factor- $\beta$  (TGF $\beta$ ) which is important for wound healing in intestinal epithelium [41], epidermal  
254 growth factor (EGF) and tumor necrosis factor (TNF), which regulate proliferation of epithelial  
255 cells and inhibit apoptosis in epithelial cells [42,43]. Inhibition of Notch signaling, which is also  
256 highlighted by GO terms, has been shown to alter the composition of cell-types in the  
257 epithelium towards Paneth and Goblet-like cells [44].

258

259 Although speculative, several of the GO terms (e.g. “calcineurin-NFAT signaling cascade”,  
260 “Inositol-phosphate mediated signaling”, “Notch receptor processing” in addition to those  
261 mentioned above) annotated to genes whose mRNA levels change in abundance upon early  
262 infection (Mm-cluster 3 and 4) can be linked to explain fundamental mechanisms. Inositol  
263 signaling can lead to release of calcium and calcineurin-dependent translocation of NFAT to  
264 the nucleus; and there to activation of NFAT target genes in T-cells, but also many other cell  
265 types [45]. In addition, changes in the host epithelium do take place when cells are invaded by,  
266 e.g., *E. falciformis*, but also generally by pathogens, and this is reflected in the stem-cell and  
267 cell cycle-related GO terms described above for Mm-clusters 1 and 2. Further investigation of  
268 the role of the processes and molecules highlighted here will contribute to better understanding  
269 for epithelial responses to intestinal intracellular parasitic infection. Interestingly, in T- and B-

270cell deficient hosts, the same four groups of genes described above (Mm-clusters 1-4, Figure  
2712B), which are responsible for these dominating responses in immune competent hosts show  
272no differences between infected and non-infected immune deficient animals.

273

#### 274***Adaptive immune responses characterize late infection***

275Pronounced transcriptional changes in the mouse host occur late in infection in immune  
276competent animals (Table 2 and Mm-cluster 5 in Figure 2B). Annotated processes and  
277functions (GO terms) for genes with increased abundance at 7 days post infection reflect the  
278expected onset of an adaptive immune response (Table S1). As late as 5 days post infection,  
279genes responsible for these enrichments are still low on mRNA abundance. This confirms a  
280strong induction of immune responses, particularly adaptive immune responses, between 5  
281and 7 days post infection. This result is well in line with previously described immune  
282responses to infection with *Eimeria* spp. [23–27].

283

#### 284***Protective responses occur earlier in challenge infected than in naïve hosts***

285Transcriptomes from three samples from early and late challenge infection show the same  
286distinct profile of elevated mRNA abundance at 3, 5 and 7 days post infection (Mm-cluster 6,  
287Figure 2B). The underlying mRNAs are highly enriched for GO terms for RNA processing, e.g.,  
288splicing, which indicated post-transcriptional regulation. In addition, terms for histone and  
289chromatin modification are enriched (Table S1). This, along with less oocyst shedding during  
290challenge infection, suggests that protective immune responses in challenge infected animals  
291are regulated both at the transcriptional and post-transcriptional level. The high abundance of  
292these mRNAs at different time-points post infection in wild-type hosts (NMRI) further indicates

293that protective immunity is similar at these time-points. Possibly, induction and chronologic  
294differences in challenge infected animals occur before 3 days post infection. The completely  
295cleared infection in some samples (Table 1; and unexpected clustering of e.g.  
296NMRI\_2ndInf\_7dpi\_rep2), apart from clearly demonstrating protection, also supports an early  
297timing of this response upon challenge infection. However, the distinct shared profile at the  
298investigated time-points (days 3, 5, and 7) does show that the protective response is still  
299detectable at the transcriptional level several days after the challenge.

300

301**A framework to interpret *E. falciformis* transcriptomes is provided by**  
302**orthologues in the Coccidia *E. tenella* and *T. gondii***

303To establish *E. falciformis* as a model for coccidian parasites, transcriptome profiles of  
304orthologue genes from closely related parasites can help to draw parallels between lifecycle  
305stages. This can be informative in predicting gene function and in analyzing evolutionary forces  
306acting on the different lifecycle stages. Therefore, we performed correlation analysis between  
307our *E. falciformis* transcriptome and RNA-seq transcriptomes from closely related parasites at  
308corresponding stages of their lifecycles. Two datasets for the economically important chicken  
309parasite *E. tenella* [46,47] and one dataset of the model apicomplexan parasite *T. gondii* [48]  
310were included. The latter was used because it is to date the only available dataset for the  
311complete in vivo lifecycle of *T. gondii* (including stages in the definitive cat host), and therefore  
312compares well with our data.

313

314For all samples from these studies and our data, abundances of orthologous genes were  
315correlated and Spearman's coefficient was compared (Figure 3). With the exception of

316sporozoites (see below), transcriptomes tend to be more strongly correlated (similar) between  
317corresponding lifecycle stages of different parasite species than between stages in the same  
318parasite species.

319

320Orthologues in *E. tenella* and *E. falciformis* gamete stages (purified gametocytes and 7 dpi  
321intestinal samples, respectively) are highly correlated in their expression across the two  
322species, indicating conserved gene sets orchestrating sexual replication of the two parasites.  
323Similarly, transcriptomes of *E. tenella* merozoites from both independent studies of that  
324parasite are most similar to early *E. falciformis* samples, indicating similarity also during  
325asexual reproduction. *E. falciformis* unsporulated oocyst transcriptomes share the highest  
326similarity with those of unsporulated *E. tenella* oocysts.

327

328*E. falciformis* sporozoites transcriptome profiles are more similar to *E. falciformis* early infection  
329samples than to sporozoite transcriptomes of *E. tenella* orthologues. Similarities between  
330sporozoites and early infection stages could be explained by similar biological processes,  
331especially host cell invasion (and reinvasion by merozoites), being prepared or performed.  
332Sporozoites are the only lifecycle stages in which orthologue mRNA abundance patterns show  
333such dissimilarities to *E. tenella* and this might indicate a higher species specificity of the  
334genes and processes in this invasive stage. This could be a result of virulence factors being  
335expressed in this stage, which are known to undergo rapid gene family expansion, as seen in  
336SAGs in *E. falciformis* [16], *T. gondii* [49], *Neospora caninum* [50], and other *Eimeria* spp. [46],  
337or *var* genes in *Plasmodium falciparum* [51].

338

339 Below we provide a detailed description of the *E. falciformis* transcriptome, including a  
340 discussion of genes which have been shown to be important in closely related parasites such  
341 as *E. tenella* and *T. gondii*.

342

### 343 **Overall transcriptional changes in the lifecycle of *E. falciformis***

344 Similar to the host transcriptome, differences in parasite mRNA abundance were mostly  
345 observed between late and early infection. Between 3 and 5 dpi 103 mRNAs were differently  
346 abundant (edgeR likelihood ratio tests on glms; FDR < 0.01), whereas between 3 and 7 dpi  
347 1399 mRNAs, and between 5 and 7 dpi 2084 mRNAs were differentially abundant (Figure 4A).  
348 Hierarchical clustering did not group samples from 3 and 5 days distinctively and we thus refer  
349 to these as "early infection" and 7 dpi as "late infection". Distinct abundance differences define  
350 early infection (parasite gene cluster 6, "Ef-cluster" hereafter, Figure 4B). At those time-points  
351 asexual reproduction takes place [17,19]. Two separate clusters define late infection (7 dpi, Ef-  
352 clusters 2 and 7) in which we assume gametocytes to be present due to the peak of oocyst  
353 shedding one day later (Figure 1A) [17] and similarity of these transcriptomes with purified *E.*  
354 *tenella* gametocytes (Figure 3). The extracellular stages, sporozoites (Ef-cluster 4) and  
355 unsporulated oocysts (Ef-clusters 1 and 5) are clearly distinct by high mRNA abundance. In  
356 order to assess the biological relevance of these patterns, we applied enrichment analyses for  
357 GO terms and "gene family conservation profiles" based on earlier annotations [16].

358

### 359 **Sporozoites express genes which are evolutionarily unique to *E. falciformis***

360 Sporozoites are in our study released from oocysts in vitro, after which they are capable of  
361 invading host cells. We suggest that the requirement for proteins which mediate motility and



362 other invasion processes are reflected by their mRNA levels in the transcriptome. We find that  
363 *E. falciformis* sporozoites are defined by a group of genes (Ef-cluster 4, Figure 4B) that is  
364 largely specific to *E. falciformis* (Table 3). This indicates that *E. falciformis* does not share with  
365 other species many of the abundant sporozoite genes so far described for those Coccidia.  
366 Interestingly, five out of 12 SAG gene transcripts predicted for *E. falciformis* [16] are typical for  
367 sporozoites. SAG proteins are thought to be involved in host cell attachment and invasion, and  
368 possibly in induction of immune responses in other apicomplexan species [46,50,52–56]. In  
369 total, mRNAs encoding ten SAGs were detected as differentially abundant in our data, but in  
370 other lifecycle stages than sporozoites. Such expression of particular SAGs in stages other  
371 than sporozoites has been reported for *E. tenella* [57]. Genes also receiving attention as  
372 potential virulence factors in *E. tenella* are rhopty kinases (RopKs) [58]. Transcripts of two out  
373 of ten *E. falciformis* orthologues of RopKs are highly abundant in sporozoites (Ef\_cluster 4).  
374 Also in *E. tenella* some RopKs are expressed predominantly in sporozoites and have been  
375 shown to be differentially expressed compared to *E. tenella* intracellular merozoite stages [59].  
376 For genes with orthologues known to be important in other Coccidia, e.g., SAGs and RopKs,  
377 orthologues indicate a molecular function, but the biological relevance of their expression in *E.*  
378 *falciformis* remains unclear.

379

380 Genes typical for the sporozoite stage displayed a species specific profile with the respective  
381 gene families absent outside *E. falciformis* (Table 3). This mirrors our analysis of orthologous  
382 genes, in which sporozoites were the only lifecycle stage not displaying strong cross-species  
383 correlation in their transcriptome. This suggests that traits involved in host cell invasion may

384have evolved quickly and rapidly become specific for a parasite in its respective host species  
385or target organ niche.

386

387For the overall biological functions of sporozoite genes (Ef-cluster 4), GO enrichment data  
388suggests ATP production and biosynthesis processes as dominant features (Table S2). In  
389addition, this invasive stage is characterized by "maintenance of protein location in cell" and  
390GO terms which indicate similar biological functions. Possibly, this reflects control of  
391microneme or rhoptry protein localization as sporozoites prepare for invasion. Sporozoites  
392therefore display a transcriptome indicative of large requirements for ATP and production of  
393known virulence factors such as SAG and RopKs and are characterized by expression of  
394species specific genes.

395

396Genes typical for the sporozoite stage displayed a species specific profile with the respective  
397gene families absent outside *E. falciformis* (Table 3). This mirrors our analysis of orthologous  
398genes, in which sporozoites were the only lifecycle stage not displaying strong cross-species  
399correlation in their transcriptome. This suggests that traits involved in host cell invasion may  
400have evolved quickly and rapidly become specific for a parasite in its respective host species  
401or target organ niche.

402

### 403 ***Growth processes dominate the transcriptome during asexual reproduction***

404Invasion of epithelial cells by sporozoites is followed by asexual reproduction leading to a  
405massive increase in parasite numbers between 3 and 5 days post infection, when several  
406rounds of schizogony take place in a somewhat unsynchronized fashion [17,19]. In early

407infection, and similar to sporozoites, mRNAs annotated for biosynthetic activity are enriched,  
408but different genes/mRNAs are contributing to enrichment of similar GO terms compared to  
409sporozoites (Table S2). Enrichment of terms referring to replication and growth-related  
410processes (biosynthesis) highlights the parasite's expansion during schizogony.

411  
412Amongst early infection high abundance mRNAs, we found four out of ten RopKs which are  
413predicted in *E. falciformis* [16]. This is the largest number of RopKs in any one group of  
414differentially abundant mRNAs in our analysis and they constitute a statistically significant  
415enrichment (Fisher's exact test;  $p < 0.001$ ). Three of these have orthologues in *T. gondii*:  
416ROP41, ROP35 and ROP21 [60-63]. Our data gives a first overview of expression patterns for  
417*E. falciformis* RopKs and offer a good starting point for functional analysis of these virulence  
418factors in *Eimeria* spp..

419  
420**Gametocyte motility dominates the transcriptome late in infection**  
421Two *E. falciformis* gene clusters show a distinct profile characterized by high mRNA  
422abundance on 7 days post infection (Ef-clusters 2 and 7; Figure 4B). Both clusters display low  
423mRNA abundance in other lifecycle stages, especially in oocysts and sporozoites. Enriched  
424GO terms such as "movement of cell or subcellular component" and "microtubule-based  
425movement" along with terms suggesting ATP production (e.g. "ATP generation from ADP")  
426indicate the presence of motile and energy demanding gametocytes in these samples. Peptide  
427and nitrogen compound biosynthetic processes along with "chitin metabolic process" (Table  
428S2) also suggest that the parasite produces building blocks for oocysts and their walls in this  
429stage. Our data confirms findings of Walker et al. (2015) in *E. tenella* gametocytes: these

430 authors also identified cytoskeleton related and transport processes as upregulated in  
431 gametocytes compared to merozoites or sporozoites [47].

432

#### 433 **Oocysts are characterized by cell differentiation and DNA replication processes**

434 Oocysts are the infective stage in the lifecycle of Coccidia. They are shed with feces as  
435 unsporulated, “immature”, capsules and in the environment they undergo sporulation – meiotic  
436 and mitotic divisions [14] – and become infective. Our oocysts were purified in the  
437 unsporulated stage from passage in lab mice. Two expression clusters of mRNA are highly  
438 abundant in this stage (Ef-clusters 1 and 5; Figure 4B). One of these oocyst gene sets (Ef-  
439 cluster 5) is enriched for apicomplexan-shared orthologues (Table 3) and for GO terms such as  
440 “DNA repair”, “protein modification process” and “cell differentiation”, supporting that expected  
441 sporulation processes have been initiated. The same cluster is also the only cluster which is  
442 enriched for transmembrane domains (Fisher’s exact test, FDR < 0.001).

443

#### 444 ***E. falciformis* does not respond plastically to differences in the host transcriptome**

445 We show that infections of *E. falciformis* in its natural host, the house mouse, follow a  
446 genetically canalized and chronological pattern independent of the immune status of the host.  
447 This is supported by the lack of separation of parasite transcriptomes from immune competent  
448 and immune deficient hosts, or from naïve and challenge infected hosts (Figure 4B). In the  
449 immune competent host, a switch from epithelial remodeling and innate immune processes to  
450 adaptive immune responses between 5 and 7 days post infection are paralleled by a parasite  
451 switch from asexual to sexual reproduction. This contemporaneity might be an evolutionary  
452 adaptation of the parasite to host responses in order to finish its lifecycle before the host

453environment becomes hostile. Such a response could be based on a) genetically canalized  
454developmental timing or b) the parasite sensing an immune challenge and establishing a  
455reaction, i.e. respond plastically. However, in an immune deficient host, which lacks the  
456described responses in its transcriptome, the parasite's transcriptome cannot be distinguished  
457from one in an immune competent host. We thereby provide evidence from hosts with variation  
458in their immune responses that support that *E. falciformis* follows a non-plastic, and instead  
459genetically canalized program during its lifecycle in the mouse host.

460

## 461 **Conclusion**

462In this dual transcriptome study, we provide a thorough description of transcriptional responses  
463in mice to infection with *E. falciformis*, and corresponding parasite transcriptomes. The mouse  
464epithelial transcriptome of naïve, immune competent mice changes upon infection. Responses  
465in wild-type challenge infected hosts suggest strong regulation both at the transcriptional level  
466and in RNA processing. In contrast, these patterns are missing in immunocompromised  
467animals which instead show a minimal transcriptional response to infection, demonstrating the  
468host dependence of mature T- and B-cells for a natural response to this coccidian parasite.

469

470For the first time we also describe the full parasite lifecycle transcriptomes of *E. falciformis*.  
471Parasite transcriptomes are not distinguishable between hosts of different immune  
472competence, demonstrating lack of plasticity at the gene expression and mRNA levels. Two  
473independent assessments of evolutionary conservation show that invasive sporozoites  
474possess the most species-specific transcriptomes in the *E. falciformis* lifecycle. We therefore

475 suggest that excysted sporozoites express most of the genes involved in host-parasite co-  
476 evolutionary processes, which accelerate divergence and may determine niche specificity.

477

478 Taken together, we propose that *E. falciformis* follows a genetically predetermined path rather  
479 than responding to cues from the host, such as differences in immune responses.

480 We further suggest that analyzing plasticity in parasites and comparing this between different  
481 host genotypes or species can be a useful tool to understand the evolutionary development of  
482 niche specificity or a generalist parasitic life-style infecting multiple different hosts or tissues.

483 We emphasize that gene expression is not necessarily a product of plastic host-parasite  
484 interactions, especially not in the parasite, but may instead follow genetically determined  
485 programs.

486

## 487 METHODS

### 488 *Mice, infection procedure and infection analysis*

489 Three strains of mice were used in our experiments: NMRI, C57BL/6 (Charles River  
490 Laboratories, Sulzfeld, Germany), and *Rag1*<sup>-/-</sup> on C57BL/6 background (obtained from German  
491 Rheumatism Research Centre, Berlin). *Rag1*<sup>-/-</sup> mice are deficient in T- and B-cell maturation.

492 Animals were infected as described by Schmid et al. [64], but tap-water was used instead of

493 PBS for administration of oocysts. Briefly, NMRI mice were infected two times, which will be  
494 referred to as naïve and challenge infection. For the naïve infection, 150 sporulated oocysts

495 were administered in 100 µL water by oral gavage. During the naïve infection of 52 mice, all

496 animals were weighed every day. On day zero, before infection, as well as on 3 dpi, 5 dpi and

497 7 dpi, ceca from 3-4 sacrificed mice per time-point were collected. Epithelial cells were isolated

498as described in Schmid et al. (2012), in which the protocol generated epithelial cells with 90 %  
499purity. For challenge infection, mice recovered spontaneously and were after four weeks  
500challenge infected. Recovery was monitored by weighing and visual inspection of fur. For the  
501challenge infection, 1500 sporulated oocysts were applied by oral gavage in 100µL water (a  
502higher dose was necessary to establish a challenge infection). Tissue from three to four mice  
503per replicate was pooled for both non-reinfection control (referred to as day 0 of challenge  
504infection) and for all other samples. *Rag1*<sup>-/-</sup> mice and the background C57BL/6 strain control  
505mice were also subjected to naïve and challenge infections with 10 sporulated oocysts in 100  
506µL water in both cases. Samples were taken on day 0 (pre-infection control) and 5 dpi in both  
507naïve and challenge infections of these mice and were otherwise treated as described above  
508for NMRI mice. Oocyst shedding was determined from eight NMRI mice in naïve infection and  
509four challenge infected, from 15 naïve *Rag1*<sup>-/-</sup> and C57BL/6 mice respectively, and from nine  
510challenge infected *Rag1*<sup>-/-</sup> and C57BL/6 mice, respectively. Overall oocyst output was  
511compared using Mann-Whitney U-test in R [65].

512

### 513 *Oocyst purification for infection, sequencing and quantification*

514 Oocysts for infection were purified by NaOCl flotation of mouse feces stored in potassium  
515 dichromate, in which oocysts for infection were allowed to sporulate at room temperature for at  
516 least five days. During the patency phase, feces of mice were collected and oocysts were  
517 floated using saturated NaCl-solution. The oocyst output was quantified using the McMaster  
518 chamber. For sequencing, unsporulated oocysts were purified twice per day from feces of  
519 NMRI mice on 8 – 10 dpi, and immediately subjected to RNA purification. The strain “E.

520*falciformis* Bayer Haberkorn 1970" was used for all infections and parasite samples, it is  
521maintained through passage in NMRI mice in our facilities as described previously [64].

522

### 523*Sporozoite isolation*

524Sporocysts were isolated according to the method of [66] with slight modifications. Briefly, not  
525more than 5 million sporulated oocysts were resuspended in 0.4% pepsin solution  
526(Applichem), pH 3, and incubated at 37°C for 1 hour. Subsequently, sporocysts were isolated  
527by mechanical shearing using glass beads (diameter 0.5 mm), washed and separated from  
528oocyst cell wall components by centrifugation at 1800 g for 10 min. Sporozoites were isolated  
529from sporocysts by in vitro excystation. For this, sporocysts were incubated at 37°C in DMEM  
530containing 0.04% tauroglycocholate (MP Biomedicals) and 0.25% trypsin (Applichem) for 30  
531min. Released sporozoites were purified in cellulose columns as described in [67].

532

### 533*RNA extraction and quantification*

534For RNA-seq, total RNA was isolated either from infected epithelial cells, sporozoites, or  
535unsporulated oocysts using Trizol according to the manufacturer's protocol (Invitrogen). In  
536addition, unsporulated oocysts in Trizol were treated by mechanical shearing using glass  
537beads for at least 20 min under frequent microscopic inspection. Purified RNA was used to  
538produce an mRNA library using Illumina's TruSeq RNA Sample Preparation guide. For qPCR,  
539uninfected and infected epithelial cells from 3, 5 and 7 dpi were isolated as described above  
540and stored in 1 mL Trizol. Total RNA was isolated using the PureLink RNA Mini Kit (Invitrogen)  
541and reverse transcribed into cDNA using the Superscript III Platinum Two Step qRT-PCR Kit  
542(Thermo Fisher Scientific).



543 These RNA preparations were used for RT-qPCR of *Eimeria* 18S and creation of a mouse  
544 gene reference index. For the reference index, the mouse genes cytochrome c-1 (Cyc),  
545 peptidylprolyl isomerase A (Ppia) and peptidylprolyl isomerase B (Ppib) were amplified using  
546 the primers Cyc1\_qPCR\_f (5'- CAGCTACCATGTCACAAGTAGC-3') and Cyc1\_qPCR\_r (5'-  
547 ACCACTTATGCCGCTTCATG -3'); Ppib\_qPCR\_f (CAAAGACACCAATGGCTCAC) and Ppib\_  
548 qPCR\_r (5'-TGACATCCTTCAGTGGCTTG-3'); Ppia\_qPCR\_f (5'-  
549 ACCGTGTTCTTCGACATCAC-3') and Ppia\_qPCR\_r (5'-ATGGCGTGTAAGTCACCAC-3'),  
550 respectively. The *E. falciformis* 18S gene was amplified using the primers Ef18s\_for (5'-  
551 ACAATTGGAGGGCAAGTCTG-3') and Ef18s\_rev (5'-AAACACCAACAGACGCAGTG-3').  
552 After initialization at 50°C followed by activation of enzymes at 95°C, 40 amplification  
553 cycles consisting of denaturation at 95°C for 15s and combined annealing and elongation  
554 at 60°C for 60s were performed. After each cycle the fluorescent signal was measured. A  
555 reference index was constructed taking the cube root of the multiplied crossing threshold (ct)-  
556 values for the tree mouse genes. This composite “index ct-value” was used to calculate the ct  
557 difference (delta-ct) of the *E. falciformis* 18S gene. The procedure was performed in technical  
558 triplicate for each sample and mean delta-ct values were taken. A linear model was  
559 constructed in R [65] to predict these normalized delta-ct values by day post infection (dpi) and  
560 type of infection (naïve or challenge infected). This model excludes measurements at 0 days  
561 post infection as background noise.

562

### 563 *Sequencing and quality assessment*

564 cDNA libraries were sequenced on either GAIIX (13 samples) or Illumina Hiseq 2000 (14  
565 samples) platforms in a total of four batches (different machine runs) as specified in Table 1. A

566fastq\_quality\_filter (FASTQ-toolkit, version 0.0.14, available at  
567[https://github.com/agordon/fastx\\_toolkit.git](https://github.com/agordon/fastx_toolkit.git)) was applied to Illumina Hiseq 2000 samples using  
568a phred score of 10. We intentionally did not use a stringent trimming before mapping to  
569genome assemblies as the mapping process itself has been shown to be a superior quality  
570control [68].

571  
572*Alignment and reference genomes*  
573The *Mus musculus* mm10 assembly (Genome Reference Consortium Mouse Build 38,  
574GCA\_000001635.2) was used as reference genome for mapping and corresponding  
575annotations were used for downstream analyses. The *E. falciformis* genome [16] was  
576downloaded from ToxoDB [49]. For mapping, mouse and parasite genome files were merged  
577into a combined reference genome, and files including mRNA sequences from both species  
578were aligned against this reference using TopHat2, version 2.0.14, [69] with the option –G  
579specified, and Bowtie2, version 1.1.2, [70]. This was done to avoid spurious mapping in ultra-  
580conserved genomic regions. Single-end and pair-end sequence samples were aligned  
581separately with library type 'fr-unstranded' specified for pair-end samples. Bam files were used  
582as input for the function “featureCounts” from of the R package “Rsubread” [71]. All  
583subsequent analyses were performed in R [65].

584

585*Differential mRNA abundance, data normalization and sample exclusions*

586After import of data to R, mouse and parasite data was separated using transcript IDs and  
587analyzed, including normalization, separately. For each species, count data was normalized  
588using the R-package edgeR version 3.16.2 [72] with the upperquartile normalization method.

589 This raw data underlying our study is available as supplementary data S1. Briefly, genes with  
590 below an overall of 3000 reads (mouse) and 100 reads (*E. falciformis*) summed over all  
591 samples (libraries) were removed and normalization factors were calculated for the 75%  
592 quantile for each library. This normalization is suitable for densities of mapping read counts  
593 which follow a negative binomial distribution. Technically, this exclusion made it possible to  
594 obtain parasite read counts in agreement with a negative binomial distribution. We excluded  
595 samples NMRI\_2nd\_3dpi\_rep1 and NMRI\_2nd\_5dpi\_rep2 due to low parasite contribution  
596 (0.012% and 0.023%) to the overall transcriptome. Technically, this exclusion made it possible  
597 to obtain parasite read counts in agreement with a negative binomial distribution. Both  
598 excluded samples are from challenge infection and it is likely that the infected mice were  
599 immune to re-infection. One additional sample (NMRI\_1stInf\_0dpi\_rep1) was excluded  
600 because the uninfected control showed unexpected mapping of reads to the *E. falciformis*  
601 genome (0.033%). As samples and individual replicates were sequenced in batches to  
602 different depth and using different instrumentation (Table 1) we performed multidimensional  
603 scaling of samples as quality controls using the function “plotMDS” provided in the R package  
604 edgeR v 3.16.2 [72].

605

#### 606 *Testing of differentially abundant mRNAs and hierarchical clustering*

607 We used edgeR v 3.16.2 [72] further to fit generalized linear models (GLMs with a negative  
608 binomial link function) for each gene (glmFit) and to perform likelihood ratio tests for models  
609 with or without a focal factor (glmLRT) using the “alternate design matrix” approach specifying  
610 focal contrasts individually. Tested contrasts comprised for the mouse a) infections at each  
611 time-point versus uninfected controls, b) corresponding time-points between different mouse

612strains and c) corresponding time-points and mouse strains for naïve and challenge infection.  
613Since the control sample for infection in naïve NMRI mice was removed from the analysis (see  
614above), the two uninfected replicates from challenge infection were used as uninfected  
615controls in all NMRI mouse analyses. For the parasite, contrasts were set between a) all  
616different stages of the lifecycle, as well as b) and c) as above (see also results in Table 2).

617  
618Mouse mRNAs which responded to infection or were differently abundant at different time-  
619points of infection (0 vs “any days post infection” or “any days post infection” vs “any days post  
620infection”; see Table 2) and *E. falciformis* genes showing differences between any lifecycle  
621stage (oocysts versus sporozoites, or either of those versus “any days post infection” or “any  
622days post infection” versus “any days post infection”) were selected and used for hierarchical  
623clustering. Hierarchical clustering was performed using the complete linkage method based on  
624Euclidean distances between Z-scores (mRNA abundance values scaled for differences from  
625mean over all samples of each gene in units of standard deviations).

626  
627*Enrichment tests and evolutionary conservation test*  
628Gene Ontology (GO) enrichment analysis was performed using the R package topGO with the  
629“weight01” algorithm and Fisher's exact tests. We additionally performed a correction for  
630multiple testing on the returned p-values (function “p.adjust” using the BH-method [73]).  
631Similarly, a Fisher's exact test and corrections for multiple testing were used to test for  
632overrepresentation of transcripts with a signal sequence for entering the secretory pathway or  
633containing transmembrane domains (as inferred using Signal P) which are predicted for the *E.*  
634*falciformis* genome [16]. Evolutionary conservation of gene families was analyzed based on

635categories from [16] which are as follows: i) *E. falciformis* specific, ii) specific to the genus  
636*Eimeria*, compiled by an analysis of *E. falciformis*, *E. maxima* and *E. tenella*, iii) Coccidia:  
637*Eimeria* plus *T. gondii* and *Neospora caninum*, iv) Coccidia plus *Babesia microti*, *Theileria*  
638*annulata*, *Plasmodium falciparum* and *Plasmodium vivax* v) the same apicomplexan parasites  
639as in iv plus *Cryosporidium hominis*, vi) universally conserved in the eukaryote super-  
640kingdom inferred from an analysis of *Saccharomyces cerevisiae* and *Arabidopsis thaliana*.  
641These categories were tested for overrepresentation in parasite gene clusters with particular  
642patterns described in the text using Fisher's exact-tests. Resulting p-values were corrected for  
643multiple testing using the procedure of Benjamini and Hochberg [72] and reported as false  
644discovery rates (FDR).

645  
646*Correlation analysis of apicomplexan transcriptomes*  
647Transcriptome datasets from [46,47] and [48] were downloaded from ToxoDB [49].  
648Orthologues between *E. falciformis*, *E. tenella* and *T. gondii* were compiled as in [16] and only  
6491:1:1 orthologue triplets were retained for analysis, as multi-paralog gene-families might  
650contain members showing divergent evolution of gene-expression due to neo/sub  
651functionalization. Mean mRNA abundances per lifecycle stage were used for samples from our  
652study. Spearman's correlation coefficients for expression over different samples in all studies  
653and over different species represented by their orthologues were determined. Hierarchical  
654clustering with complete linkage was used to cluster resulting correlations coefficients.

#### 655 **COMPETING INTERESTS**

656The authors declare that they have no competing interests.

657

## 658 **AUTHOR CONTRIBUTIONS**

659 TE, SS, CD, RL and EH designed the experiments, RL performed infections, EH obtained  
660 grant support for the work, RL, SS, CD and EH gathered the data, EH and TE analyzed the  
661 data, TE and EH drafted the manuscript, TE, SS, RL and EH edited the manuscript, all authors  
662 contributed original ideas to the research and agreed on the final version of the manuscript.

663

## 664 **ACKNOWLEDGEMENTS**

665 The authors wish to thank Frank Seeber and Toni Aebischer for valuable comments on the  
666 manuscript, Annica Rebbig for establishing the mouse reference index for RT-qPCR and Kirs  
667 Blank for support in oocyst purification and counting, parasite passaging and RT-qPCRs.

668

## 669 **FUNDING**

670 The study was funded by the DFG Research Training Group 2046 "Parasite Infections: From  
671 Experimental Models to Natural Systems" (TE) and DFG individual grant [285969495](#) (EH).

672

## 673 **ETHICS STATEMENT**

674 Animal procedures were performed according to the German Animal Protection Laws as  
675 directed and approved by the overseeing authority Landesamt fuer Gesundheit und Soziales  
676 (Berlin, Germany) under numbers H0098/04 and G0039/11.

677

## 678 **Tables**

679 **Table 1** Summary of data per sample, sorted according to number of reads mapping to the *E.*  
680 *falciformis* genome.

| Sample*                  | Sequencing method | Batch ** | Total reads | Reads mapping mouse | Reads mapping <i>E. falciformis</i> | Percentage <i>E. falciformis</i> | # <i>E. falciformis</i> genes **** |
|--------------------------|-------------------|----------|-------------|---------------------|-------------------------------------|----------------------------------|------------------------------------|
| NMRI_2ndInf_0dpi_rep1    | GAI               | 2        | 108,937,797 | 70,489,674          | 247                                 | 0.0004                           | 1                                  |
| Rag_1stInf_0dpi_rep1     | hiseq             | 3        | 25,362,793  | 18,853,850          | 443                                 | 0.0023                           | 2                                  |
| C57BL/6_1stInf_0dpi_rep1 | hiseq             | 3        | 35,731,249  | 25,119,348          | 457                                 | 0.0018                           | 2                                  |
| C57BL/6_1stInf_0dpi_rep2 | hiseq             | 3        | 47,085,959  | 34,377,133          | 608                                 | 0.0018                           | 2                                  |
| Rag_1stInf_0dpi_rep2     | hiseq             | 3        | 46,556,156  | 35,233,327          | 676                                 | 0.0019                           | 2                                  |
| NMRI_2ndInf_0dpi_rep2    | hiseq             | 3        | 58,122,244  | 40,794,245          | 3,406                               | 0.0083                           | 51                                 |
| NMRI_2ndInf_3dpi_rep1*** | hiseq             | 3        | 57,934,016  | 40,544,287          | 4,803                               | 0.0118                           | 95                                 |
| NMRI_2ndInf_5dpi_rep2*** | hiseq             | 3        | 63,965,539  | 48,289,181          | 10,941                              | 0.0227                           | 407                                |
| NMRI_1stInf_0dpi_rep1*** | GAI               | 1        | 82,364,585  | 55,176,243          | 17,954                              | 0.0325                           | 701                                |
| NMRI_2ndInf_3dpi_rep2    | hiseq             | 3        | 65,548,826  | 46,171,909          | 29,548                              | 0.0640                           | 1,580                              |
| NMRI_2ndInf_7dpi_rep2    | hiseq             | 3        | 67,487,466  | 51,722,265          | 40,091                              | 0.0775                           | 1,836                              |
| Rag_1stInf_5dpi_rep1     | hiseq             | 3        | 38,651,359  | 29,982,453          | 63,024                              | 0.2098                           | 2,548                              |
| Rag_1stInf_5dpi_rep2     | hiseq             | 3        | 34,779,832  | 25,297,803          | 99,000                              | 0.3898                           | 2,828                              |
| C57BL/6_1stInf_5dpi_rep1 | hiseq             | 3        | 40,904,388  | 29,319,604          | 185,969                             | 0.6303                           | 4,173                              |
| Rag_2ndInf_5dpi_rep1     | hiseq             | 3        | 50,049,848  | 37,093,621          | 192,856                             | 0.5172                           | 4,167                              |
| C57BL/6_1stInf_5dpi_rep2 | hiseq             | 3        | 29,511,368  | 18,062,349          | 215,696                             | 1.1801                           | 3,823                              |
| C57BL/6_2ndInf_5dpi_rep1 | hiseq             | 3        | 35,148,432  | 25,660,184          | 262,909                             | 1.0142                           | 4,563                              |
| NMRI_1stInf_3dpi_rep1    | GAI               | 1        | 73,236,430  | 49,993,358          | 394,384                             | 0.7827                           | 5,220                              |
| NMRI_1stInf_3dpi_rep2    | GAI               | 2        | 160,709,694 | 117,791,044         | 413,051                             | 0.3494                           | 4,862                              |
| NMRI_1stInf_5dpi_rep2    | GAI               | 2        | 119,902,722 | 76,419,774          | 794,570                             | 1.0290                           | 5,333                              |
| NMRI_2ndInf_5dpi_rep1    | GAI               | 2        | 230,773,955 | 143,186,486         | 1,846,840                           | 1.2734                           | 5,533                              |
| NMRI_2ndInf_7dpi_rep1    | hiseq             | 3        | 70,366,762  | 41,467,146          | 3,634,201                           | 17.2335                          | 5,875                              |
| NMRI_1stInf_5dpi_rep1    | GAI               | 2        | 76,702,168  | 47,037,087          | 3,669,701                           | 15.5631                          | 5,700                              |
| Sporozoites_rep2         | GAI               | 0        | 19,551,681  | 3,656               | 11,470,604                          | 99.9246                          | 5,513                              |
| NMRI_1stInf_5dpi_rep3    | GAI               | 0        | 191,099,180 | 83,735,624          | 27,839,458                          | 24.9513                          | 5,784                              |
| NMRI_1stInf_7dpi_rep1    | GAI               | 1        | 66,505,514  | 3,310,666           | 39,400,884                          | 92.2488                          | 5,932                              |
| Sporozoites_rep1         | GAI               | 1        | 67,325,397  | 4,334               | 43,774,401                          | 99.9901                          | 5,825                              |
| Oocysts_rep1             | GAI               | 1        | 68,859,802  | 3,805               | 49,653,065                          | 99.9923                          | 5,695                              |
| Oocysts_rep2             | GAI               | 0        | 151,090,783 | 18,524              | 71,019,860                          | 99.9739                          | 5,777                              |
| NMRI_1stInf_7dpi_rep2    | GAI               | 1        | 139,749,046 | 21,699,324          | 73,539,445                          | 77.2159                          | 5,943                              |

681

682\* Sample names are given with information separated by underscore as follows: 1) mouse  
683strain, 2) naïve (1<sup>st</sup>) or challenge (2<sup>nd</sup>) infection, 3) dpi (days post infection), and 4) replicate  
684number.

685\*\* Number of expressed *E. falciformis* genes (read counts >5).

686\*\*\* These samples were removed from downstream analyses because of uncertain infection  
687status.

688

689**Table 2** Number of mouse and *E. falciformis* mRNAs significantly differentially abundant in  
690different comparisons (Contrasts). Empty cells indicate that comparison is not applicable.

| Contrast                                       | Number of <i>E. falciformis</i> mRNAs<br>with FDR < 0.01 | Number of mouse mRNAs<br>with FDR < 0.01 |
|------------------------------------------------|----------------------------------------------------------|------------------------------------------|
| NMRI 7 dpi vs. uninfected control              |                                                          | 2,711                                    |
| NMRI 5 dpi vs. uninfected control              |                                                          | 1,804                                    |
| NMRI 3 dpi vs. NMRI 7 dpi                      | 1,399                                                    | 1,322                                    |
| C57BL/6 5 dpi vs. uninfected control           |                                                          | 919                                      |
| NMRI 7 dpi naïve vs NMRI 7 dpi challenge       | 0                                                        | 857                                      |
| NMRI 5 dpi vs. NMRI 7 dpi                      | 2,084                                                    | 732                                      |
| <i>Rag1</i> <sup>-/-</sup> vs C57BL/6          |                                                          | 362                                      |
| NMRI 3 dpi vs ctrl                             |                                                          | 325                                      |
| C57BL/6 5 dpi naïve vs C57BL/6 5 dpi challenge | 0                                                        | 175                                      |
| <i>Rag1</i> <sup>-/-</sup> 5 dpi vs control    |                                                          | 42                                       |
| NMRI 3 dpi naïve vs NMRI 3 challenge           | 1                                                        | 18                                       |
| NMRI 3 dpi vs. NMRI 5 dpi                      | 103                                                      | 0                                        |
| NMRI 5 dpi vs. oocysts                         | 3,691                                                    |                                          |
| Sporozoites vs. oocysts                        | 3,532                                                    |                                          |
| NMRI 3 dpi vs. oocysts                         | 3,303                                                    |                                          |
| NMRI 7 dpi vs. oocysts                         | 3,202                                                    |                                          |
| NMRI 7 dpi vs. sporozoites                     | 2,663                                                    |                                          |
| NMRI 5 dpi vs. sporozoites                     | 1,726                                                    |                                          |
| NMRI 3 dpi vs. sporozoites                     | 1,705                                                    |                                          |
| NMRI control vs. C57BL/6 control               | 13                                                       |                                          |

691

692**Table 3** Enrichments and underrepresentation of species or species-group orthologues in *E.*  
693*falciformis* gene clusters (from Figure 3b). Odds ratios higher than one indicate enrichment and  
694smaller than one indicate underrepresentation. Conservation categories were chosen as  
695previously described [16]. Only significant results (FDR < 0.05) are shown.

| <i>E. falciformis</i> cluster | Conservation<br>category | Odds ratio | p-value | FDR |
|-------------------------------|--------------------------|------------|---------|-----|
|-------------------------------|--------------------------|------------|---------|-----|



|                                  |                       |      |          |          |
|----------------------------------|-----------------------|------|----------|----------|
| Ef-cluster 2 (up at 7 dpi)       | Conserved             | 0.67 | 9.03E-06 | 1.90E-04 |
| Ef-cluster 4 (up in sporozoites) | Conserved             | 0.72 | 2.44E-04 | 1.71E-03 |
| Ef-cluster 7 (up at 7 dpi)       | Conserved             | 1.72 | 1.11E-10 | 4.65E-09 |
| Ef-cluster 2 (up at 7 dpi)       | ApicomplexaC          | 0.45 | 1.84E-04 | 1.71E-03 |
| Ef-cluster 5 (up in oocysts)     | ApicomplexaC          | 1.86 | 3.76E-05 | 5.26E-04 |
| Ef-cluster 4 (up in sporozoites) | <i>E. falciformis</i> | 3.05 | 2.38E-04 | 1.71E-03 |
| Ef-cluster 1 (up in oocysts)     | <i>Eimeria</i>        | 0.68 | 1.83E-03 | 9.59E-03 |
| Ef-cluster 6 (up in early inf)   | Apicomplexa           | 1.46 | 1.11E-03 | 6.64E-03 |

696

697

## 698 Figures

699 **Figure 1.** Oocyst output and changes in intensity of *E. falciformis* infection in mouse. Oocyst  
700 counts in naïve and challenge infection are shown for three different mouse strains. For  
701 infection of naïve NMRI 150 oocysts were used, for challenge infection 1500 oocysts.  
702 For C57BL/6 and *Rag1*<sup>-/-</sup> mice 10 oocysts were used in each infection. A) Overall output of  
703 shed oocysts and B) shedding kinetics are depicted. C) RT-qPCR data of *E. falciformis* 18S in  
704 NMRI mice displays an increase in parasite mRNA over the course of infection. Significantly  
705 less parasite 18S transcripts (normalized against host transcripts of house-keeping genes)  
706 were detected in challenge infected mice. Formulas and prediction lines are given for linear  
707 models. D) The percentage of parasite mRNA detected by RNA-seq increases during infection  
708 (shown for NMRI). More mRNA is detected in naïve mice compared to challenge infected mice.  
709 Sporozoites and oocysts contained ~100% parasite material.

710

711 **Figure 2.** Differentially abundant mouse mRNAs and clustering thereof. A) Venn diagram  
712 visualizes the overlap between genes showing differential abundance (FDR < 0.01; edgeR glm  
713 likelihood-ratio tests) between i) uninfected controls and different time-points post infection and  
714 ii) between different time-points and the sum of all genes reacting to infection. Controls from

715 challenge infection were used. B) Hierarchical clustering of differentially abundant mRNAs  
716 performed on Euclidean distances using complete linkage. Cluster cut-offs (dendrogram  
717 resolution) were set to identify gene-sets with profiles interpretable in relation to the parasite  
718 lifecycle and between mice of different immune competence.

719

720 **Figure 3.** Correlations of *E. falciformis* mRNA abundance with orthologues from other Coccidia.  
721 *E. falciformis* mRNA abundance was compared to that of orthologous genes of *E. tenella*  
722 [46,47] and *T. gondii* [48]. Correlation coefficients (Spearman's  $\rho$ ) were clustered using  
723 complete linkage. *T. gondii* and *Eimeria* spp. “late infection” samples cluster together. *E.*  
724 *falciformis* early infection samples cluster with *E. tenella* merozoites. *E. falciformis* sporozoites  
725 cluster with *E. falciformis* early infection, whereas unsporulated oocysts cluster with *E. tenella*  
726 unsporulated oocysts.

727

728 **Figure 4.** Differentially abundant *E. falciformis* mRNAs and clustering thereof. A) Venn diagram  
729 visualizes the overlap between genes showing differential abundance (FDR < 0.01; edgeR glm  
730 likelihood-ratio tests) between intracellular stages at 3 days post infection, 5 days post  
731 infection and 7 days post infection. B) Hierarchical clustering of abundance profiles for  
732 differentially abundant mRNAs performed on Euclidean distances using complete linkage.  
733 Cluster cut-offs (dendrogram resolution) were set to identify gene-sets with profiles  
734 interpretable in relation to the parasite lifecycle.

735

736 **SUPPLEMENTARY INFORMATION**

737

## 738 **Supplementary Figures**

739 **Figure S1.** Ordinations on mouse and parasite transcriptomes. The results of multidimensional  
740 scaling analyses are displayed for mouse and *E. falciformis* using different labels to allow  
741 comparisons.

742 **Figure S2.** Controls for the properties of mRNA abundance distributions after setting different  
743 abundance thresholds per mRNA over all samples.

744 **Figure S3.** Mouse mRNA abundance in late *E. falciformis* infection versus uninfected controls,  
745 assessed by both RNA-seq (present data) and microarray. Mouse data from 7 days post  
746 infection (RNA-seq) and 6 days post infection. In both experiments, NMRI mice were infected  
747 with the same *E. falciformis* isolate. Even with one day difference in sampling, mouse  
748 transcriptomes show a strong correlation. The line depicted for visualisation corresponds to  
749 generalized additive model using penalized regression splines.

750 **Figure S4.** Weight loss of mice during *E. falciformis* infection.

751 Mouse weight is shown as a percentage relative to weight at the time of infection. Infection  
752 dose for NMRI was 150 oocysts in naïve infection and 1500 in challenge infection. For  
753 C57BL/6 and Rag1<sup>-/-</sup> dose was 10 oocysts in both naïve and challenge infection. Bars indicate  
754 standard error for three or four replicates.

755

## 756 **Supplementary Tables**

757 Table S1: GO terms enriched in Mm-clusters in Figure 2B.

758 Table S2: GO terms enriched in Ef-clusters in Figure 4B.

759

## 760 **REFERENCES**

761

1. Stearns SC. The evolutionary significance of phenotypic plasticity. *BioScience*. 1989;39:436–45.
2. Dodson S. Predator-induced reaction norms. *BioScience*. 1989;39:447–52.
3. Pancer Z, Cooper MD. The evolution of adaptive immunity. *Annu. Rev. Immunol.* 2006;24:497–518.
4. Viney M, Diaz A. Phenotypic plasticity in nematodes. *Worm*. 2012;1:98–106.
5. Stear MJ, Bairden K, Duncan JL, Holmes PH, McKellar QA, Park M, et al. How hosts control worms. *Nature*. 1997;389:27–27.
6. Weclawski U, Heitlinger EG, Baust T, Klar B, Petney T, Han Y-S, et al. Rapid evolution of *Anguillicola crassus* in Europe: species diagnostic traits are plastic and evolutionarily labile. *Front. Zool.* 2014;11:74.
7. Weclawski U, Heitlinger EG, Baust T, Klar B, Petney T, San Han Y, et al. Evolutionary divergence of the swim bladder nematode *Anguillicola crassus* after colonization of a novel host, *Anguilla anguilla*. *BMC Evol. Biol.* 2013;13:78.
8. Heitlinger E, Taraschewski H, Weclawski U, Gharbi K, Blaxter M. Transcriptome analyses of *Anguillicola crassus* from native and novel hosts. *PeerJ*. 2014;2:e684.
9. Weber C, Koutero M, Dillies M-A, Varet H, Lopez-Camarillo C, Coppée JY, et al. Extensive transcriptome analysis correlates the plasticity of *Entamoeba histolytica* pathogenesis to rapid phenotype changes depending on the environment. *Sci. Rep.* 2016. <http://www.ncbi.nlm.nih.gov/pmc/articles/PMC5073345/>. Accessed 23 Feb 2017.
10. Lovegrove FE, Peña-Castillo L, Mohammad N, Liles WC, Hughes TR, Kain KC. Simultaneous host and parasite expression profiling identifies tissue-specific transcriptional programs associated with susceptibility or resistance to experimental cerebral malaria. *BMC Genomics*. 2006;7:295.
11. da Silva F, da Fonseca M, Barbosa HS, Gross U, Lüder CGK. Stress-related and spontaneous stage differentiation of *Toxoplasma gondii*. *Mol. Biosyst.* 2008;4:824–34.
12. Buchholz KR, Fritz HM, Chen X, Durbin-Johnson B, Rocke DM, Ferguson DJ, et al. Identification of tissue cyst wall

components by transcriptome analysis of in vivo and in vitro *Toxoplasma gondii* bradyzoites. *Eukaryot. Cell.* 2011;10:1637

13. Sibley DL, Charron A, Håkansson S, Mordue D. Invasion and Intracellular Survival by *Toxoplasma*. In: Madame Curie Bioscience Database [Internet]. Austin (TX): Landes Bioscience; 2000-2013. Available from:

<https://www.ncbi.nlm.nih.gov/books/NBK6450/2013>

14. Duszynski DW. *Eimeria*, *Eimeria*. eLS. John Wiley & Sons, Ltd. 2011.

<http://onlinelibrary.wiley.com/doi/10.1002/9780470015902.a0001962.pub2/abstract>. Accessed 10 Oct 2016.

15. Chapman HD, Barta JR, Blake D, Gruber A, Jenkins M, Smith NC, et al. A selective review of advances in coccidiosis research. *Adv. Parasitol.* 2013;83:93.

16. Heitlinger E, Spork S, Lucius R, Dieterich C. The genome of *Eimeria falciiformis* - reduction and specialization in a single host apicomplexan parasite. *BMC Genomics.* 2014;15:696.

17. Haberkorn A. Die Entwicklung von *Eimeria falciiformis* (Eimer 1870) in der weißen Maus (*Mus musculus*). *Z. Für Parasitenkd.* 1970;34:49–67.

18. Schmid M, Heitlinger E, Spork S, Mollenkopf H-J, Lucius R, Gupta N. *Eimeria falciiformis* infection of the mouse cecum identifies opposing roles of IFN $\gamma$ -regulated host pathways for the parasite development. *Mucosal Immunol.* 2013;7:969-982

19. Mesfin GM, Bellamy JEC. Effects of acquired resistance on infection with *Eimeria falciiformis* var. *pragensis* in mice. *Infect. Immun.* 1979;23:108–14.

20. Montes C, Rojo F, Hidalgo R, Ferre I, Badiola C. Selection and development of a Spanish precocious strain of *Eimeria necatrix*. *Vet. Parasitol.* 1998;78:169–83.

21. Pakandl M. Selection of a precocious line of the rabbit coccidium *Eimeria flavescens* Marotel and Guilhon (1941) and characterisation of its endogenous cycle. *Parasitol. Res.* 2005;97:150–5.

22. Rose ME. Immune responses in infections with *Coccidia*: Macrophage activity. *Infect. Immun.* 1974;10:862–71.

23. Blagburn BL, Todd KS. Pathological changes and immunity associated with experimental *Eimeria vermiformis* infections

in *Mus musculus*. *J. Protozool.* 1984;31:556–61.

24. Rose ME, Hesketh P, Wakelin D. Immune control of murine coccidiosis: CD4<sup>+</sup> and CD8<sup>+</sup> T lymphocytes contribute differentially in resistance to primary and secondary infections. *Parasitology.* 1992;105:349–54.

25. Gadde U, Chapman HD, Rathinam TR, Erf GF. Acquisition of immunity to the protozoan parasite *Eimeria adenoeides* in turkey poults and the peripheral blood leukocyte response to a primary infection. *Poult. Sci.* 2009;88:2346–52.

26. Sühwold A, Hermosilla C, Seeger T, Zahner H, Taubert A. T-cell reactions of *Eimeria bovis* primary- and challenge-infected calves. *Parasitol. Res.* 2010;106:595–605.

27. Stange J, Hepworth MR, Rausch S, Zajic L, Kühl AA, Uyttenhove C, et al. IL-22 mediates host defense against an intestinal intracellular parasite in the absence of IFN- $\gamma$  at the cost of Th17-driven immunopathology. *J. Immunol. Baltim. Md 1950.* 2012;188:2410–8.

28. Foth BJ, Zhang N, Chaal BK, Sze SK, Preiser PR, Bozdech Z. Quantitative time-course profiling of parasite and host cell proteins in the human malaria parasite *Plasmodium falciparum*. *Mol. Cell. Proteomics MCP.* 2011;10:1-16.

29. Li Y, Shah-Simpson S, Okrah K, Belew AT, Choi J, Caradonna KL, et al. Transcriptome remodeling in *Trypanosoma cruzi* and human cells during intracellular infection. *PloS Pathog.* 2016;12:e1005511.

30. Fernandes MC, Dillon LAL, Belew AT, Bravo HC, Mosser DM, El-Sayed NM. Dual transcriptome profiling of *Leishmania*-infected human macrophages reveals distinct reprogramming signatures. *mBio.* 2016;7:e00027-16.

31. Westermann AJ, Förstner KU, Amman F, Barquist L, Chao Y, Schulte LN, et al. Dual RNA-seq unveils noncoding RNA functions in host-pathogen interactions. *Nature.* 2016;529:496–501.

32. Rosani U, Varotto L, Domeneghetti S, Arcangeli G, Pallavicini A, Venier P. Dual analysis of host and pathogen transcriptomes in ostreid herpesvirus 1-positive *Crassostrea gigas*. *Environ. Microbiol.* 2015;17:4200–12.

33. Ovington KS, Alleva LM, Kerr EA. Cytokines and immunological control of *Eimeria* spp. *Int. J. Parasitol.* 1995;25:1331–51.

34. Stephenson LS, Latham MC, Ottesen EA. Malnutrition and parasitic helminth infections. *Parasitology*. 2000;121:S23–38.
35. Aloisio F, Filippini G, Antenucci P, Lepri E, Pezzotti G, Cacciò SM, et al. Severe weight loss in lambs infected with *Giardia duodenalis* assemblage B. *Vet. Parasitol.* 2006;142:154–8.
36. Preston-Mafham RA, Sykes AH. Changes in body weight and intestinal absorption during infections with *Eimeria acervulina* in the chicken. *Parasitology*. 1970;61:417.
37. Sharman PA, Smith NC, Wallach MG, Katrib M. Chasing the golden egg: Vaccination against poultry coccidiosis. *Parasite Immunol.* 2010;32:590-98
38. Stange J. Studies on host-pathogen interactions at mucosal barrier surfaces using the murine intestinal parasite *Eimeria falciformis* - Deutsche Digitale Bibliothek. 2012. <http://www.deutsche-digitale-bibliothek.de/item/DDAKP5LJSJBAPPALDVQ5Y52YV3AG7NCL>. Accessed 16 Dec 2016
39. Kuhn KA, Manieri NA, Liu T-C, Stappenbeck TS. IL-6 stimulates intestinal epithelial proliferation and repair after injury. *PloS One*. 2014;9:e114195.
40. Park H, Li Z, Yang XO, Chang SH, Nurieva R, Wang Y-H, et al. A distinct lineage of CD4 T-cells regulates tissue inflammation by producing interleukin 17. *Nat. Immunol.* 2005;6:1133–41.
41. Beck PL, Rosenberg IM, Xavier RJ, Koh T, Wong JF, Podolsky DK. Transforming growth factor-beta mediates intestinal healing and susceptibility to injury in vitro and in vivo through epithelial cells. *Am. J. Pathol.* 2003;162:597–608.
42. Suzuki A, Sekiya S, Gunshima E, Fujii S, Taniguchi H. EGF signaling activates proliferation and blocks apoptosis of mouse and human intestinal stem/progenitor cells in long-term monolayer cell culture. *Lab. Investig. J. Tech. Methods Pathol.* 2010;90:1425–36.
43. Kaiser GC, Polk DB. Tumor necrosis factor alpha regulates proliferation in a mouse intestinal cell line. *Gastroenterology*. 1997;112:1231–40.
44. VanDussen KL, Carulli AJ, Keeley TM, Patel SR, Puthoff BJ, Magness ST, et al. Notch signaling modulates proliferation and differentiation of intestinal crypt base columnar stem cells. *Dev. Camb. Engl.* 2012;139:488–97.

45. Macian F. NFAT proteins: key regulators of T-cell development and function. *Nat. Rev. Immunol.* 2005;5:472–84.
46. Reid AJ, Blake DP, Ansari HR, Billington K, Browne HP, Bryant JM, et al. Genomic analysis of the causative agents of coccidiosis in domestic chickens. *Genome Res.* 2014;gr.168955.113–.
47. Walker R a, Sharman P a, Miller CM, Lippuner C, Okoniewski M, Eichenberger RM, et al. RNA Seq analysis of the *Eimeria tenella* gametocyte transcriptome reveals clues about the molecular basis for sexual reproduction and oocyst biogenesis. *BMC Genomics.* 2015;16:1–20.
48. Hehl AB, Basso WU, Lippuner C, Ramakrishnan C, Okoniewski M, Walker RA, et al. Asexual expansion of *Toxoplasma gondii* merozoites is distinct from tachyzoites and entails expression of non-overlapping gene families to attach, invade, and replicate within feline enterocytes. *BMC Genomics.* 2015;16:66.
49. Gajria B, Bahl A, Brestelli J, Dommer J, Fischer S, Gao X, et al. ToxoDB: an integrated *Toxoplasma gondii* database resource. *Nucleic Acids Res.* 2007;36:D553–6.
50. Reid AJ, Vermont SJ, Cotton JA, Harris D, Hill-Cawthorne GA, Könen-Waisman S, et al. Comparative genomics of the Apicomplexan parasites *Toxoplasma gondii* and *Neospora caninum*: Coccidia differing in host range and transmission strategy. *PLoS Pathog.* 2012;8:e1002567.
51. Gardner MJ, Hall N, Fung E, White O, Berriman M, Hyman RW, et al. Genome sequence of the human malaria parasite *Plasmodium falciparum*. *Nature.* 2002;419:498–511.
52. Mineo JR, Kasper LH. Attachment of *Toxoplasma gondii* to host cells involves major surface protein, SAG-1 (P-30). *Exp. Parasitol.* 1994;79:11–20.
53. Grimwood J, Smith JE. *Toxoplasma gondii*: the role of parasite surface and secreted proteins in host cell invasion. *Int. J. Parasitol.* 1996;26:169–73.
54. Cowman AF, Crabb BS. Invasion of red blood cells by malaria parasites. *Cell.* 2006;124:755–66.
55. Carruthers V, Boothroyd JC. Pulling together: an integrated model of *Toxoplasma* cell invasion. *Curr. Opin. Microbiol.* 2007;10:83–9.



56. Chow Y-P, Wan K-L, Blake DP, Tomley F, Nathan S. Immunogenic *Eimeria tenella* glycosylphosphatidylinositol-anchored surface antigens (SAGs) induce inflammatory responses in avian macrophages. *PLoS ONE*. 2011 <http://www.ncbi.nlm.nih.gov/pmc/articles/PMC3182191/>. Accessed 29 Dec 2016.
57. Tabarés E, Ferguson D, Clark J, Soon P-E, Wan K-L, Tomley F. *Eimeria tenella* sporozoites and merozoites differentially express glycosylphosphatidylinositol-anchored variant surface proteins. *Mol. Biochem. Parasitol.* 2004;135:123–32.
58. Talevich E, Kannan N. Structural and evolutionary adaptation of rhoptry kinases and pseudokinases, a family of coccidian virulence factors. *BMC Evol. Biol.* 2013;13:117.
59. Oakes RD, Kurian D, Bromley E, Ward C, Lal K, Blake DP, et al. The rhoptry proteome of *Eimeria tenella* sporozoites. *Int. J. Parasitol.* 2013;43:181–8.
60. Taylor S, Barragan A, Su C, Fux B, Fentress SJ, Tang K, et al. A secreted serine-threonine kinase determines virulence in the eukaryotic pathogen *Toxoplasma gondii*. *Science*. 2006;314:1776–80.
61. Saeij JPJ, Collier S, Boyle JP, Jerome ME, White MW, Boothroyd JC. *Toxoplasma* co-opts host gene expression by injection of a polymorphic kinase homologue. *Nature*. 2007;445:324–7.
62. Fleckenstein MC, Reese ML, Könen-Waisman S, Boothroyd JC, Howard JC, Steinfeldt T. A *Toxoplasma gondii* Pseudokinase Inhibits Host IRG Resistance Proteins. *PloS Biol.* 2012;10:e1001358.
63. Fox BA, Rommereim LM, Guevara RB, Falla A, Triana MAH, Sun Y, et al. The *Toxoplasma gondii* rhoptry kinome is essential for chronic infection. *mBio*. 2016;7:e00193-16.
64. Schmid M, Lehmann MJ, Lucius R, Gupta N. Apicomplexan parasite, *Eimeria falciformis*, co-opts host tryptophan catabolism for life cycle progression in mouse. *J. Biol. Chem.* 2012;287:20197–20207.
65. R Development Core Team. R: A language and environment for statistical computing. R Foundation for Statistical Computing, Vienna, Austria. 2008. <http://www.R-project.org>
66. Kowalik S, Zahner H. *Eimeria separata*: method for the excystation of sporozoites. *Parasitol. Res.* 1999;85:496–9.

67. Schmatz DM, Crane MSJ, Murray PK. Purification of Eimeria sporozoites by DE-52 anion exchange chromatography. *J. Protozool.* 1984;31:181–183.
68. MacManes MD. On the optimal trimming of high-throughput mRNA sequence data. *Front. Genet.* 2014. <http://journal.frontiersin.org/article/10.3389/fgene.2014.00013/abstract>. Accessed 29 Dec 2016.
69. Trapnell C, Pachter L, Salzberg SL. TopHat: discovering splice junctions with RNA-Seq. *Bioinformatics.* 2009;25:1105–11.
70. Langmead B, Salzberg SL. Fast gapped-read alignment with Bowtie 2. *Nat. Methods.* 2012;9:357–9.
- 71 Liao Y, Smyth GK, Shi W. featureCounts: an efficient general purpose program for assigning sequence reads to genomic features. *Bioinformatics.* 2014;30:923–30.
72. Robinson MD, McCarthy DJ, Smyth GK. edgeR: a Bioconductor package for differential expression analysis of digital gene expression data. *Bioinformatics.* 2010;26:139–140.
73. Benjamini Y, Hochberg Y. Controlling the false discovery rate: A practical and powerful approach to multiple testing. *J. R. Stat. Soc. Ser. B Methodol.* 1995;57:289–300.

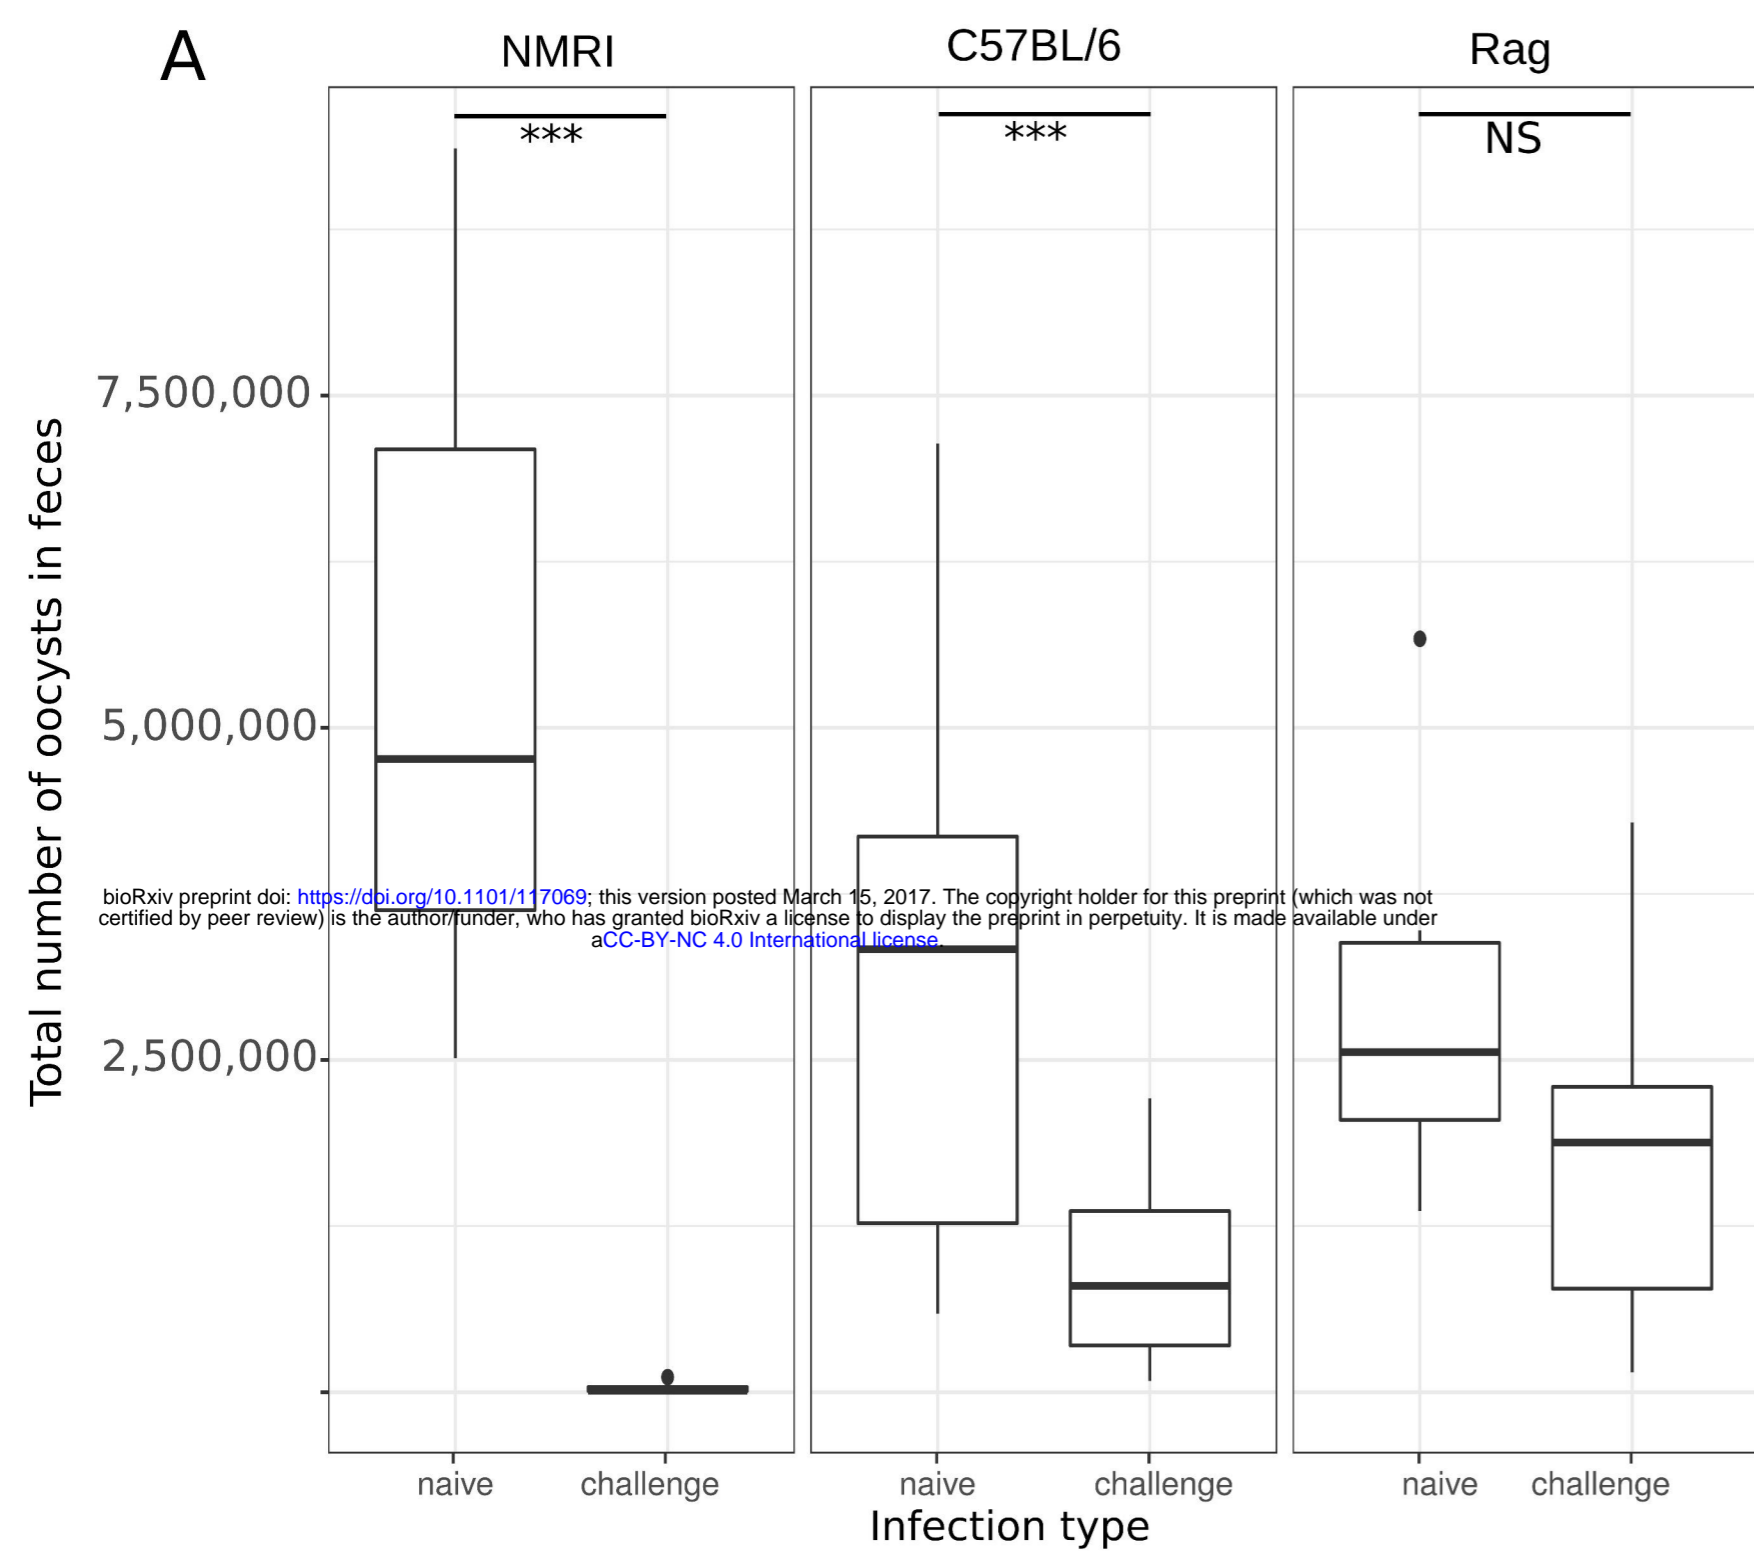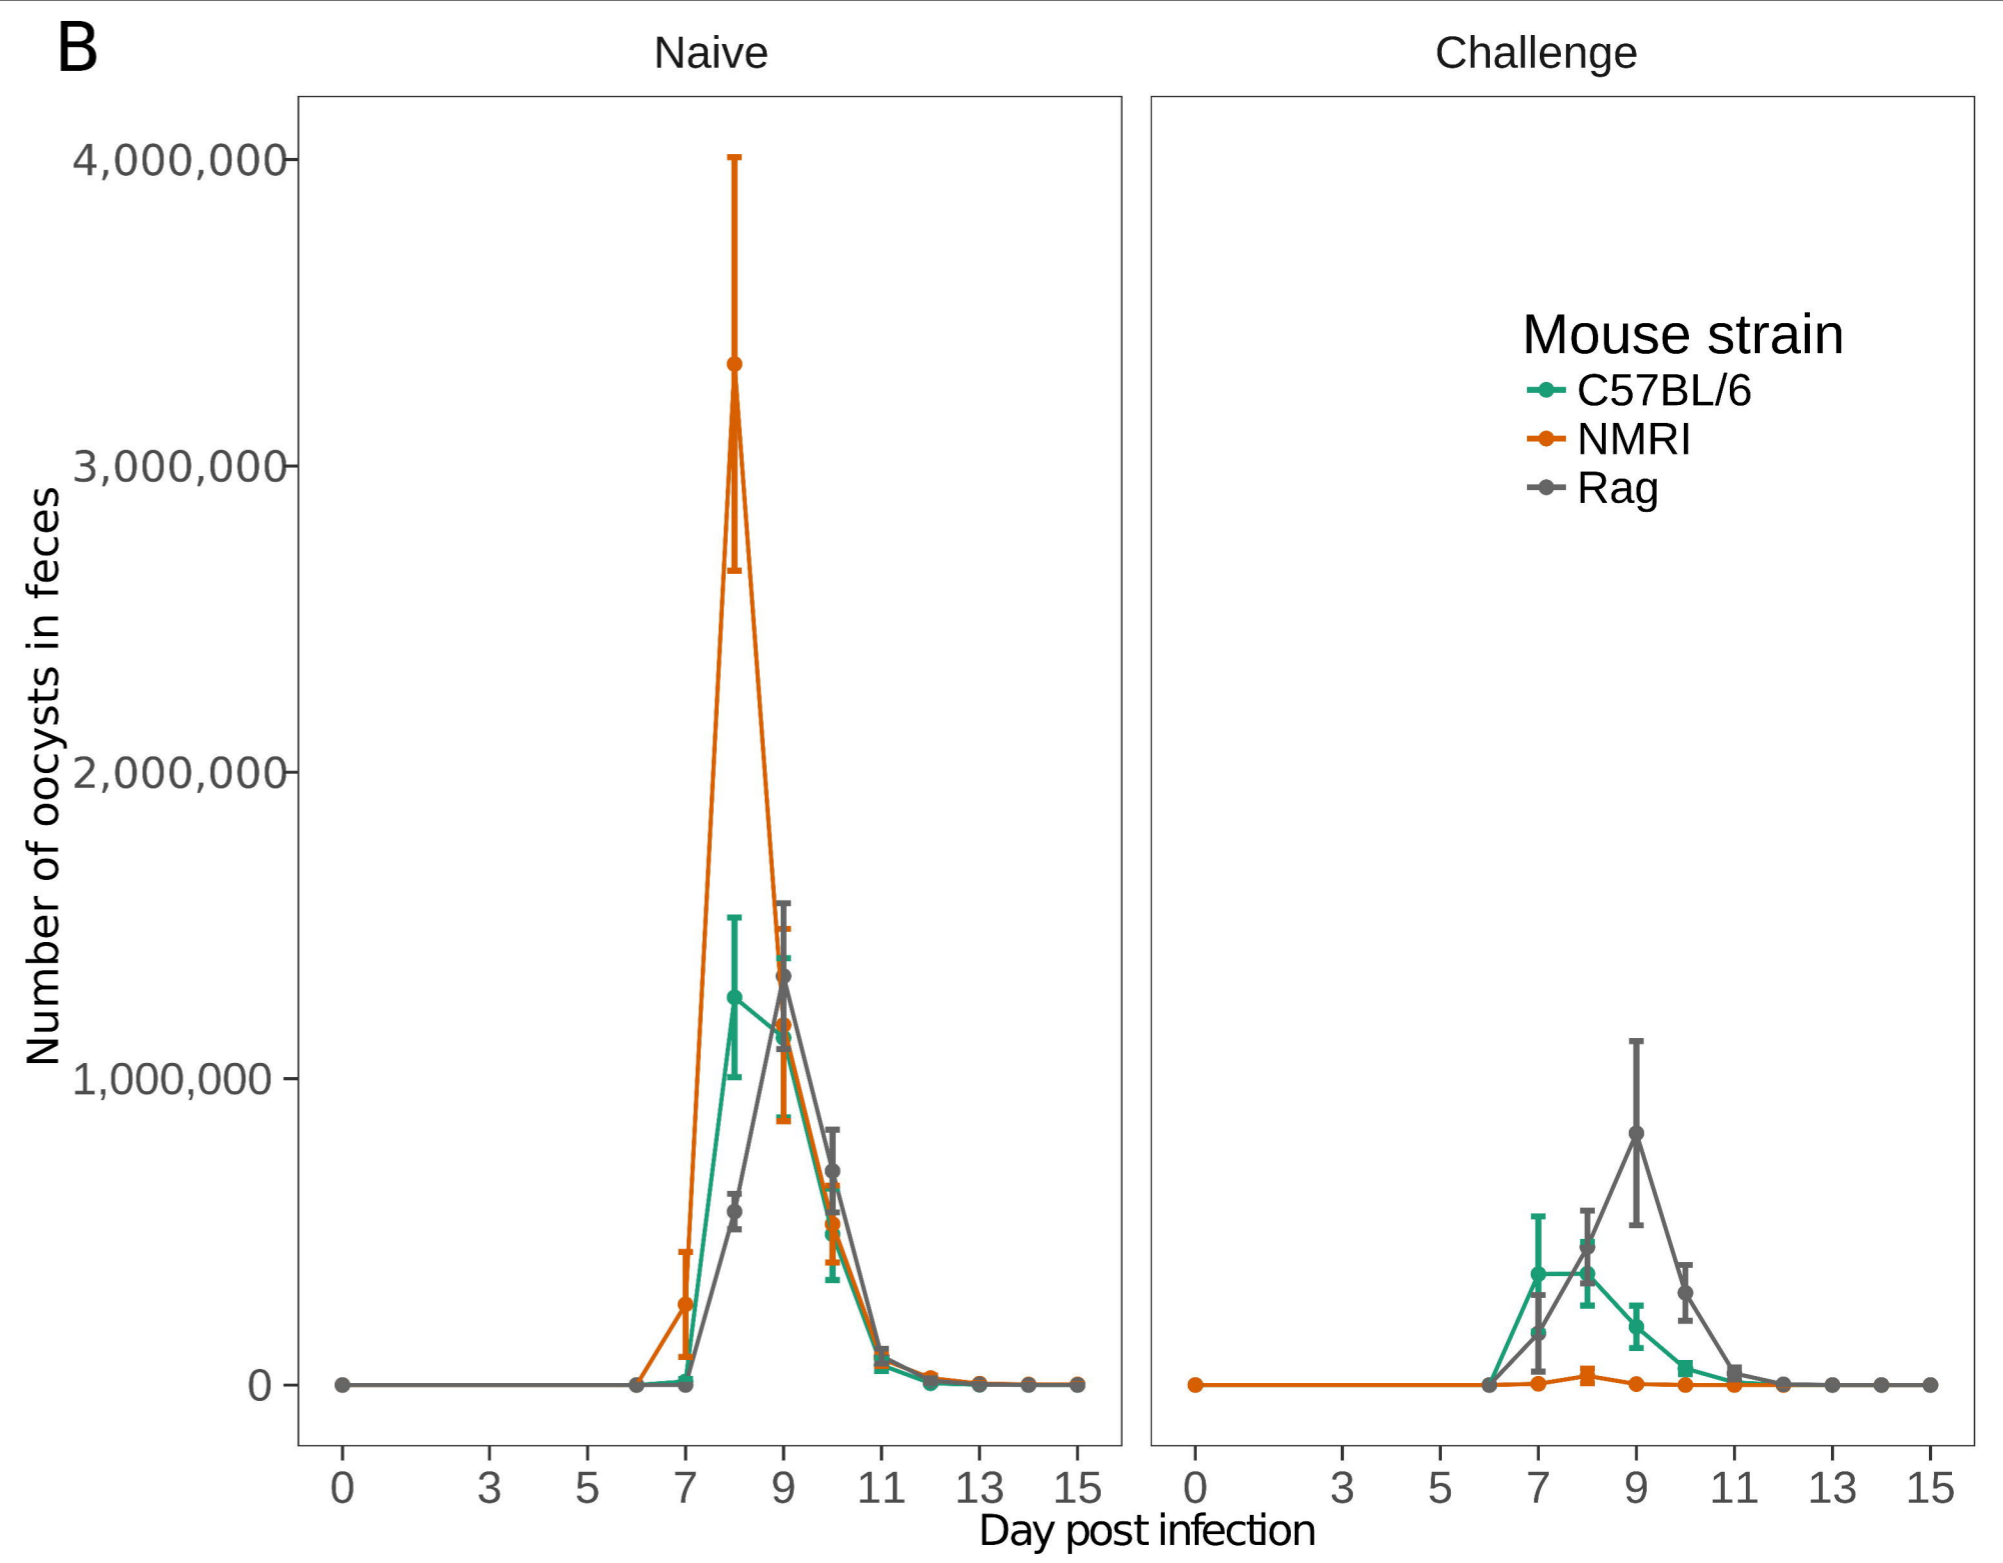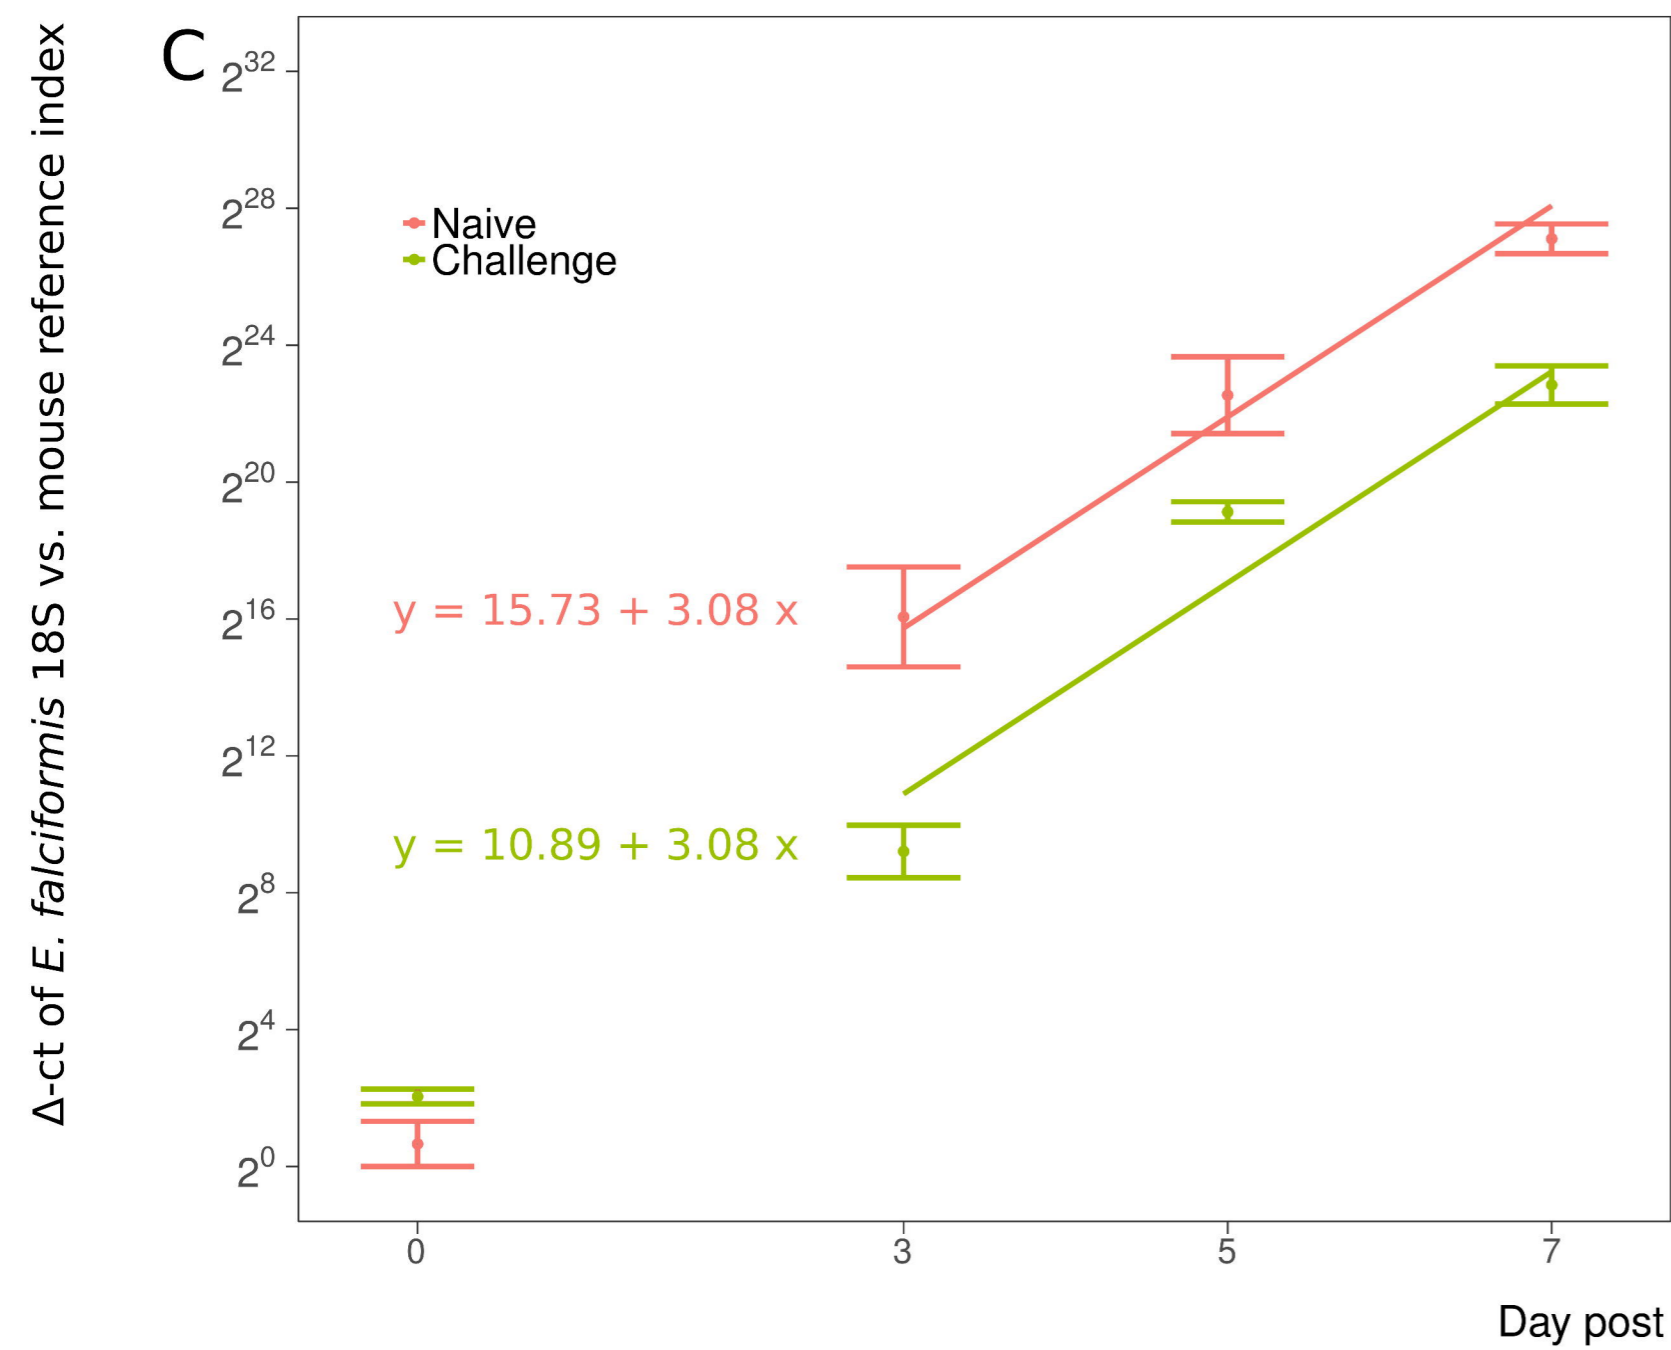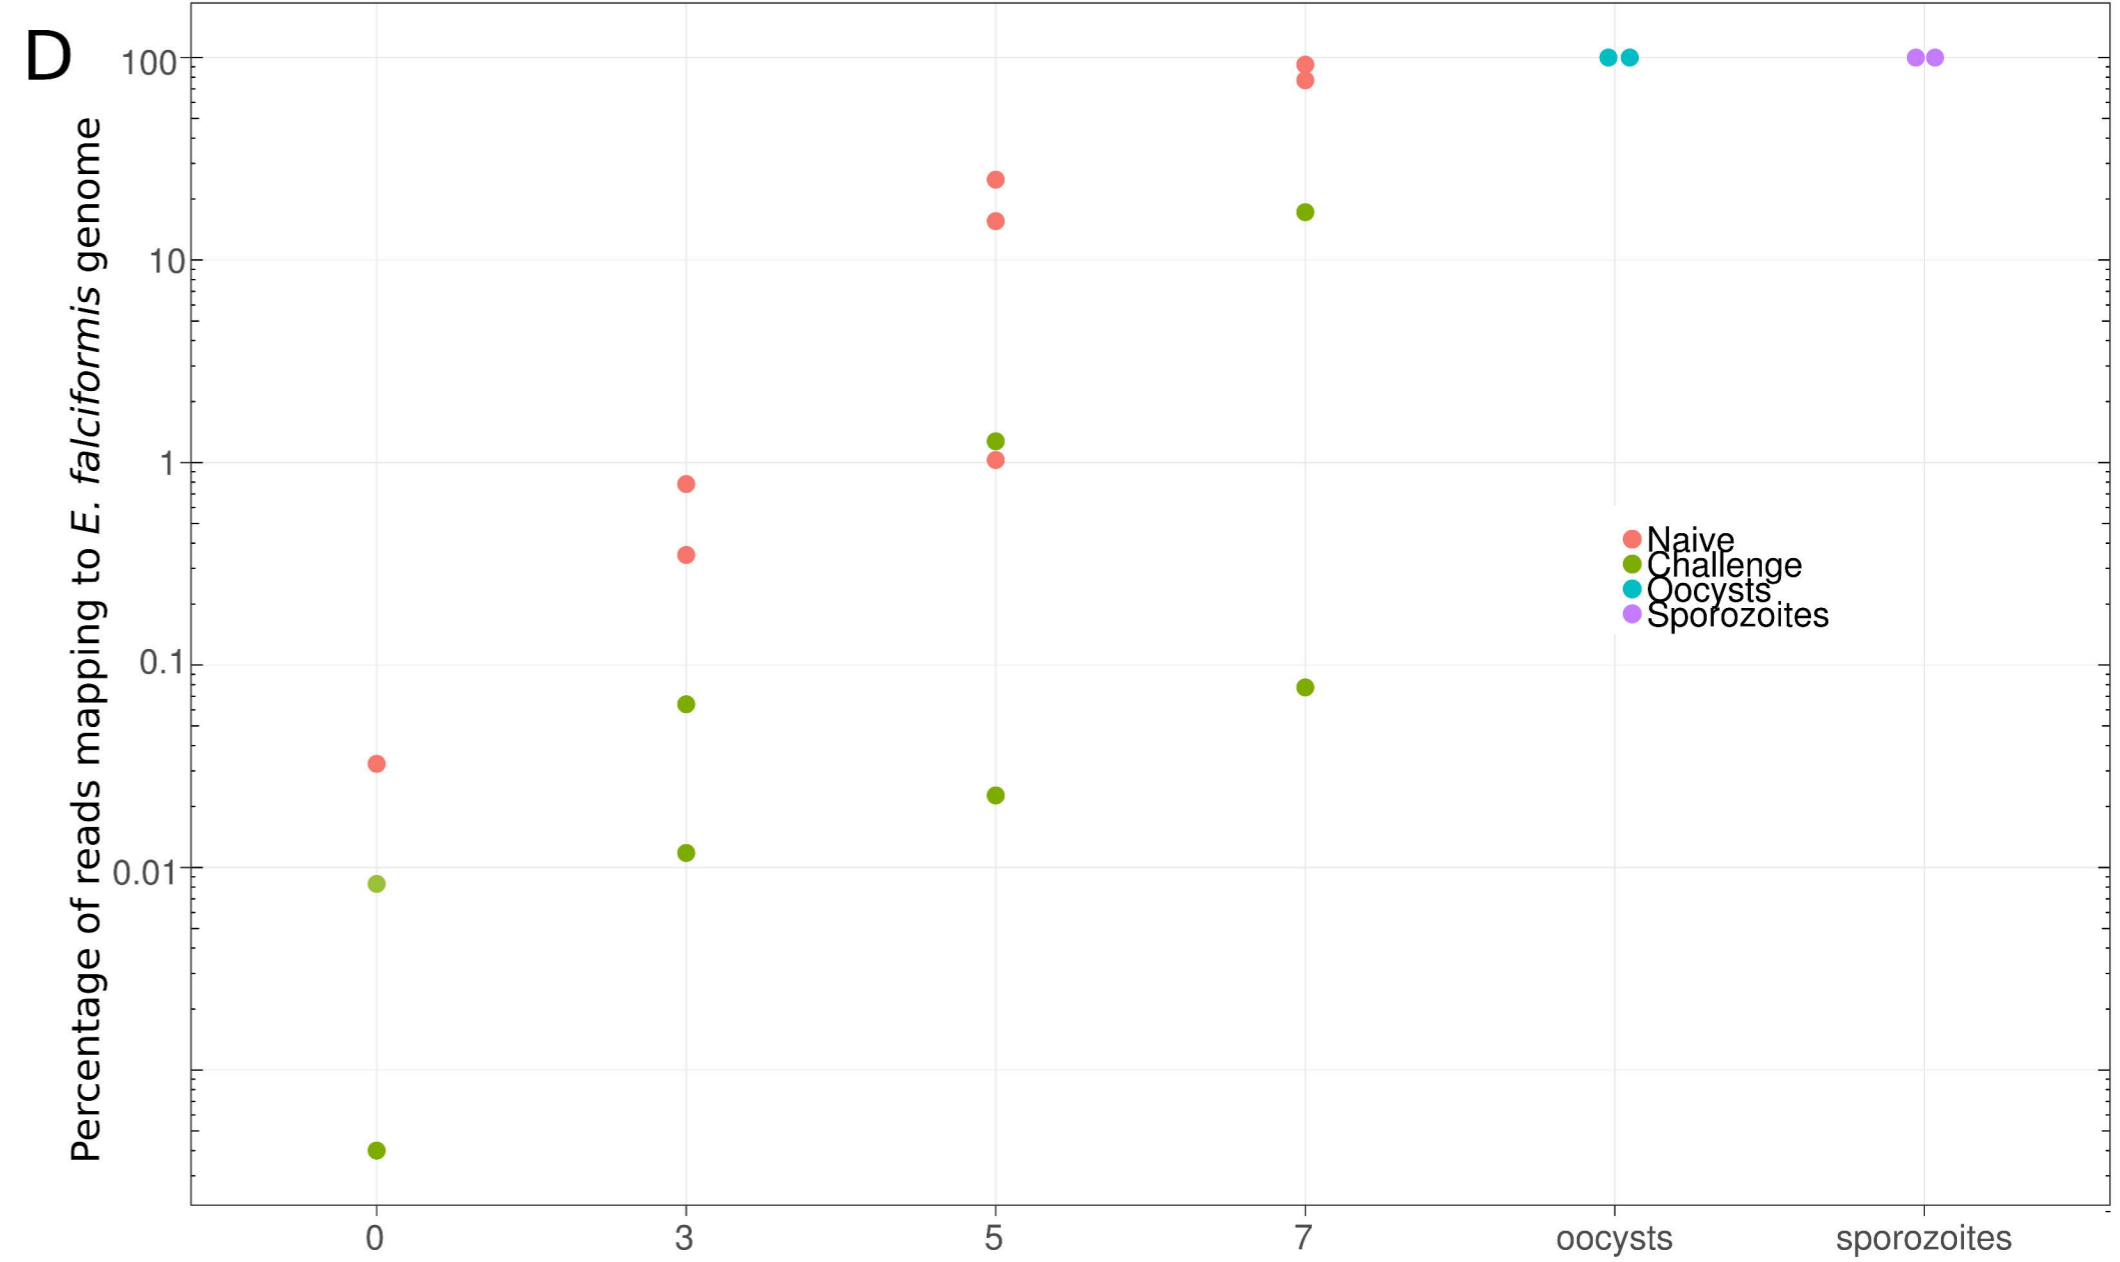

A

Differentially abundant mRNAs  
between mouse groups

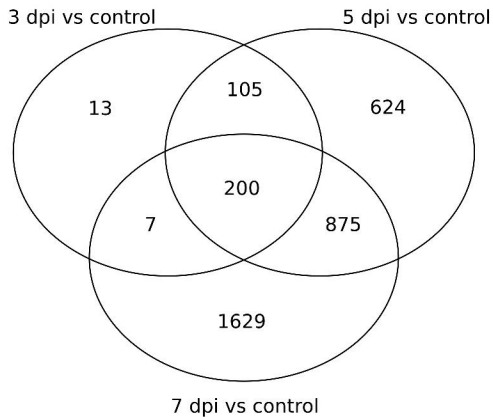

B

*M. musculus* mRNAs differently abundant at different dpi

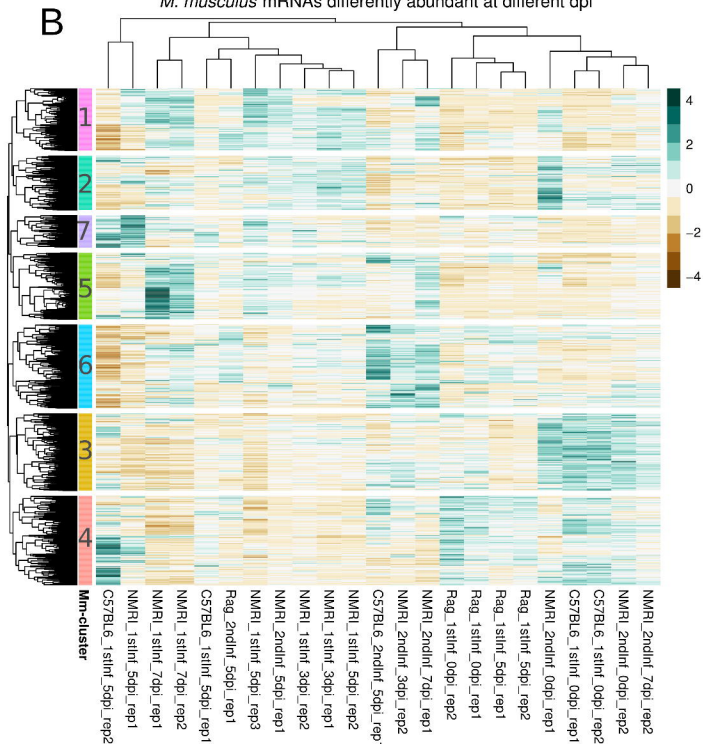

# Correlation of mRNA abundance of orthologous genes from *E. falcififormis*, *E. tenella* and *T. gondii* in different lifecycle stages

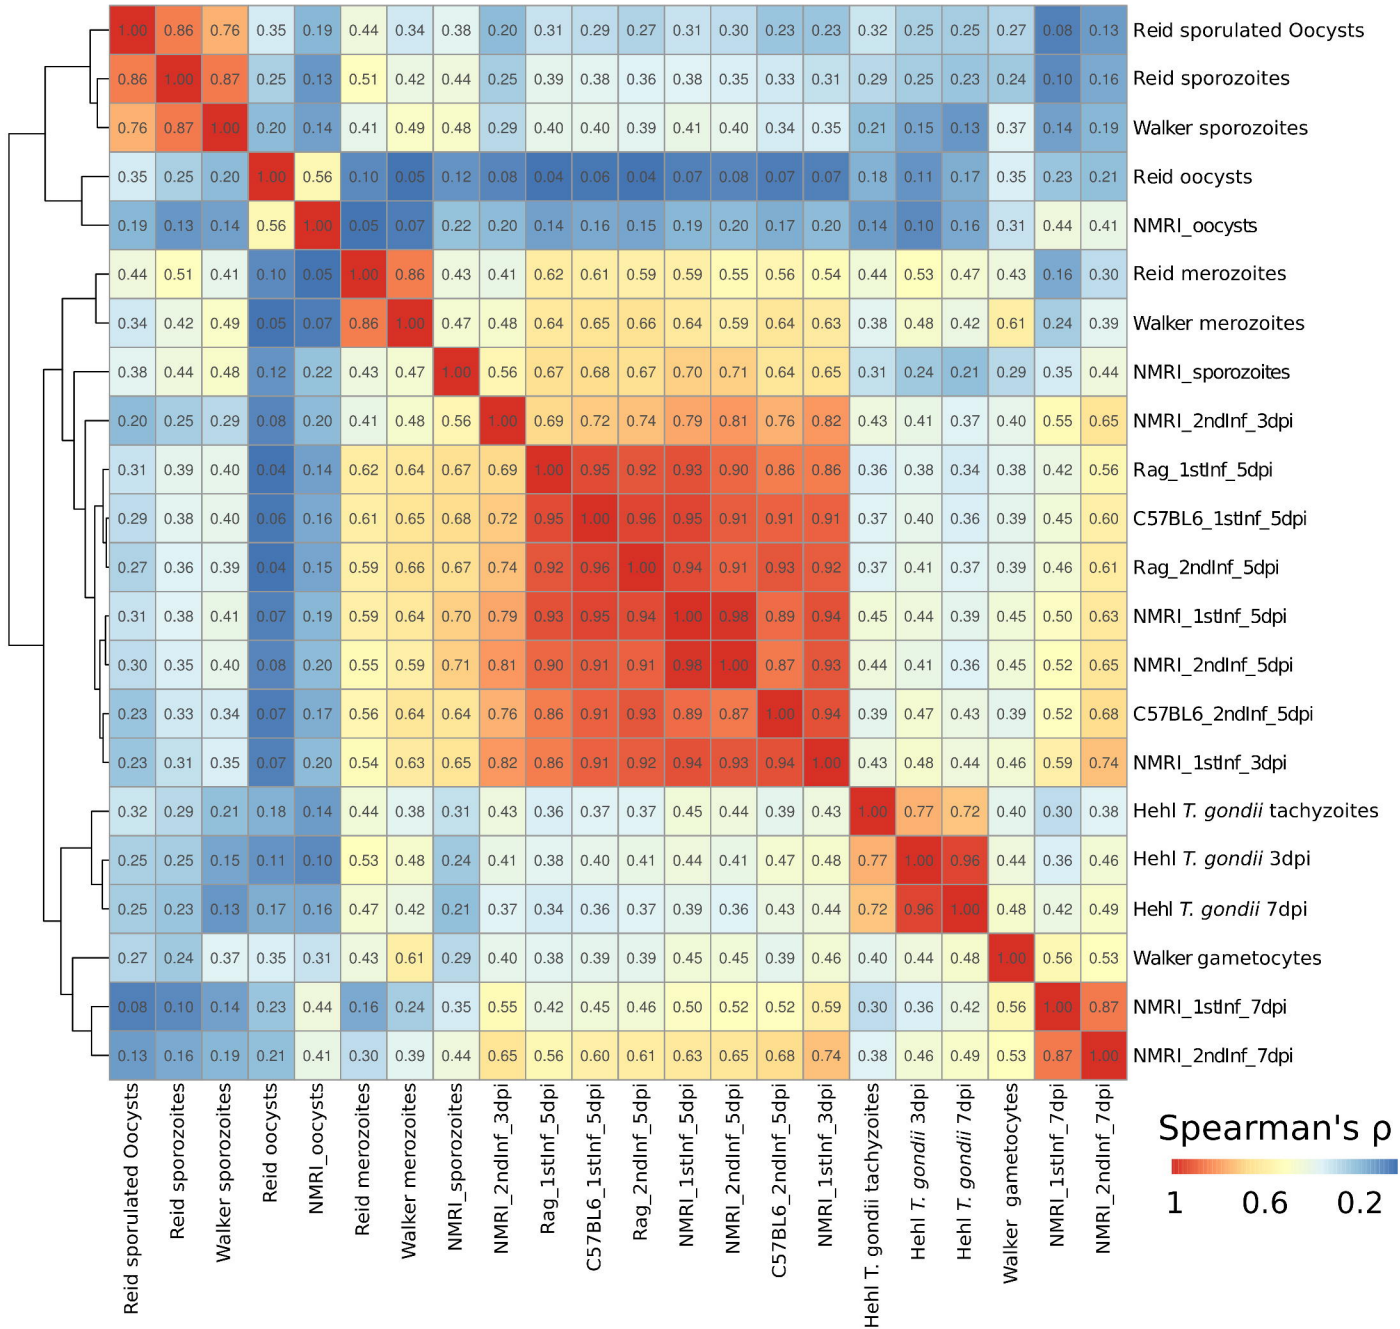

A

Differentially abundant mRNAs  
between *E. falciformis* groups

3 dpi vs 5 dpi

3 dpi vs 7 dpi

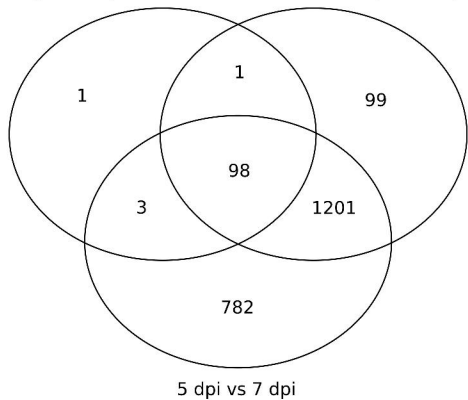

B

*E. falciformis* mRNAs differently abundant at different dpi

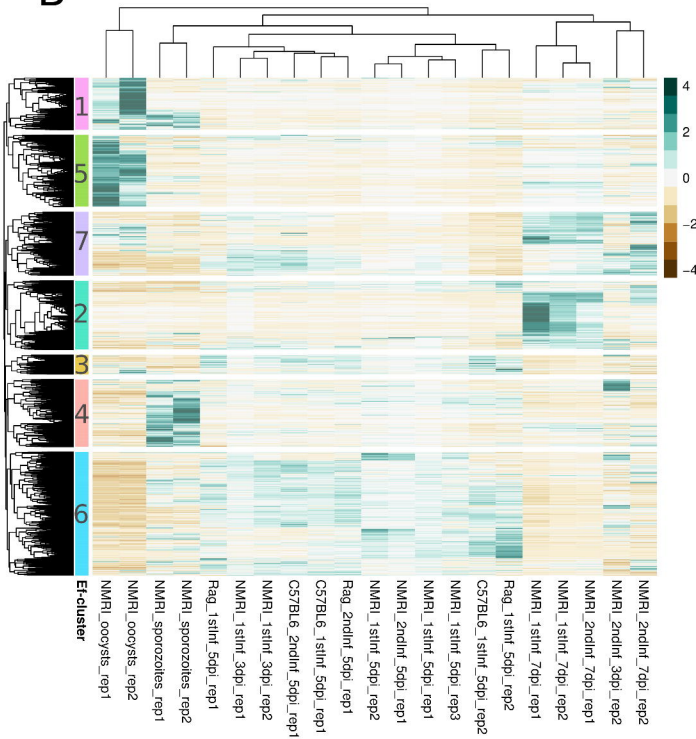

Source: https://www.biorxiv.org/content/10.1101/117069v1.full.pdf
